# Supplementary material for: Bioconjugation of Green Fluorescent Protein via an Unexpectedly Stable Cyclic Sulfonium Intermediate
Source: PubMed Central journal article supplement (PMC3487180; doi:10.1002/cbic.201200231), 2012-05-25
Supplement: cbic0013-1283-SD1.pdf [file cbic0013-1283-SD1.pdf]

**CHEMBIOCHEM**

## Supporting Information

© Copyright Wiley-VCH Verlag GmbH & Co. KGaA, 69451 Weinheim, 2012

### **Bioconjugation of Green Fluorescent Protein via an Unexpectedly Stable Cyclic Sulfonium Intermediate**

Ramiz Nathani, Paul Moody, Mark E. B. Smith, Richard J. Fitzmaurice, and Stephen Caddick<sup>\*[a]</sup>

cbic\_201200231\_sm\_miscellaneous\_information.pdf

## General Procedure

All reagents were purchased from Sigma-Aldrich and used without any purification. Solvents were purchased from Fisher and used without purification. 2,5-Dibromohexanediamide (**2**) was synthesized as reported by Davis.<sup>1</sup>

## Protein Mass Spectroscopy

LC-MS was performed on protein samples using a Thermo Scientific uPLC connected to MSQ Plus Single Quad Detector (SQD). Column: Hypersil Gold C4 1.9 $\mu$ m 2.1 x 50 mm. Wavelength: 254 nm. Mobile Phase: 99:1 Water (0.1% formic acid): MeCN (0.1% formic acid) to 1:9 Water (0.1% formic acid): MeCN (0.1% formic acid) gradient over 4 min. Flow Rate: 0.3 mL/min. MS Mode: ES+. Scan Range: m/z = 500-2000. Scan time: 1.5 sec. Data obtained in continuum mode. The electrospray source of the MS was operated with a capillary voltage of 3.5 kV and a cone voltage of 50 V. Nitrogen was used as the nebulizer and desolvation gas at a total flow of 600 L/h. Total mass spectra for protein samples were reconstructed from the ion series using the pre-installed ProMass software using default settings for large proteins in m/z range 500-1500.

## Cloning and expression of GFP(S147C) 6

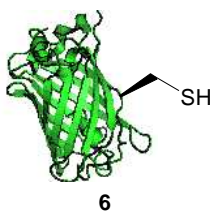

Calculated mass = 29343

GFP(S147C) 6 was cloned and expressed as reported by Caddick and analysed by LCMS.<sup>2</sup>

Sequence:

```
MHHHHHHSSGVDLGTDNLYFQSMRKGEELFTGVVPILVELDGDVNGHKFSVRGEGEGDATNGKLTCLKFI  
CTTGKLPVPWPTLVTTLYGVQCFAFYDPDHMKQHDFFKSAMPEGYVQERTISFKDDGTYKTRAEVKFEF  
DTLVNRIELKGIDFKEDGNILGHKLEYNFNCHNVYITADKQKNGIKANFKIRHNVEDGQSVQLADHYQQNT  
PIGDGPVLLPDNHYLSTQSVLSKDPNEKRDHMLLEFVTAAGITHGMDELYK
```

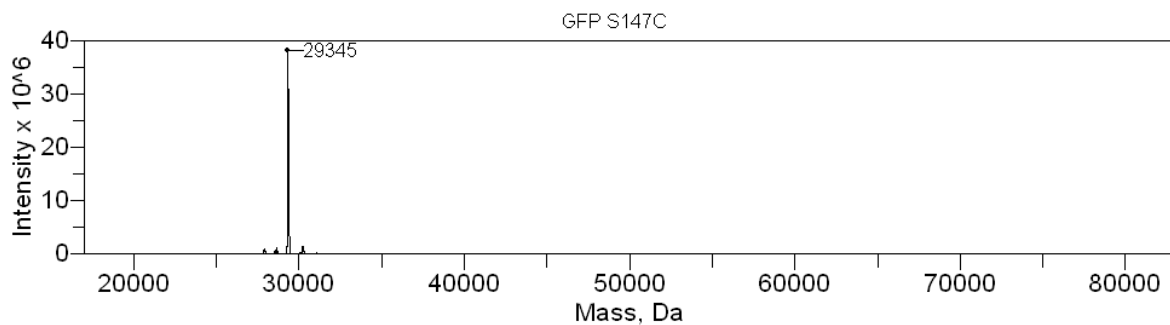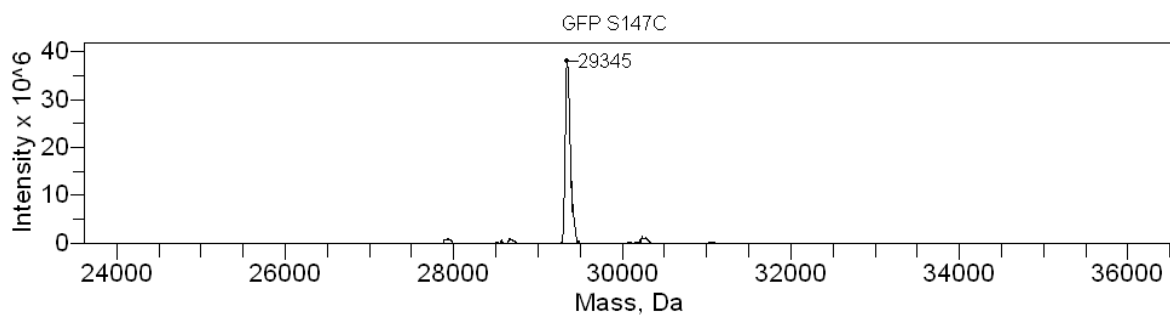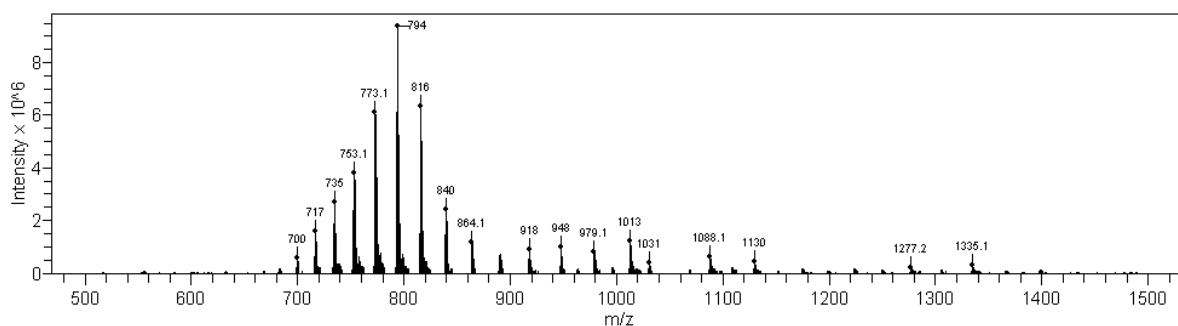

## Reaction of GFP(S147C) with 2,5-dibromohexanediamide (2)

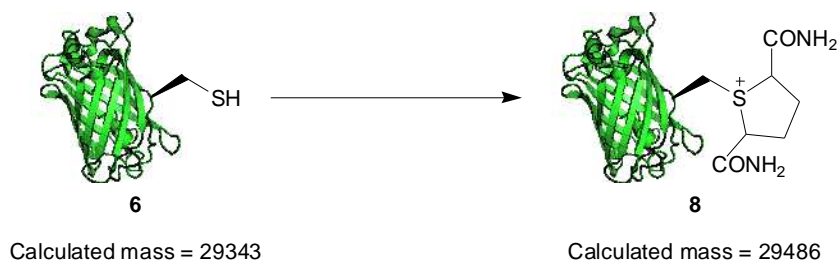

2,5-Dibromohexanediamide (**2**) (10  $\mu\text{L}$ , 340 mM solution in DMF, 1000 equivalents) was added to a solution of GFP(S147C) (100  $\mu\text{L}$ , 1.0 mg/mL) in sodium phosphate (100 mM, pH 8.0) at 21  $^{\circ}\text{C}$ . The mixture was vortexed for 1 s and then maintained at 21  $^{\circ}\text{C}$  for 30 min. The solid precipitates were removed by centrifugation (1 min, 12K g) and the supernatant was heated to 37  $^{\circ}\text{C}$  for 1 h. The reaction was analyzed by LCMS. Sulphonium **8** formed in >95% conversion.

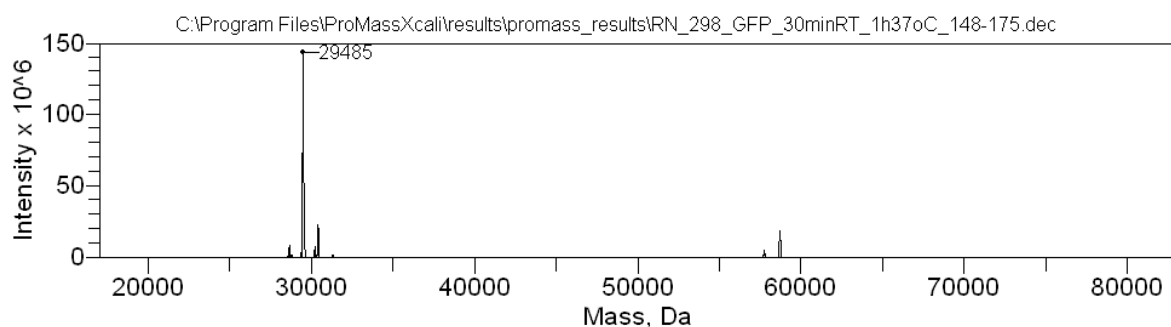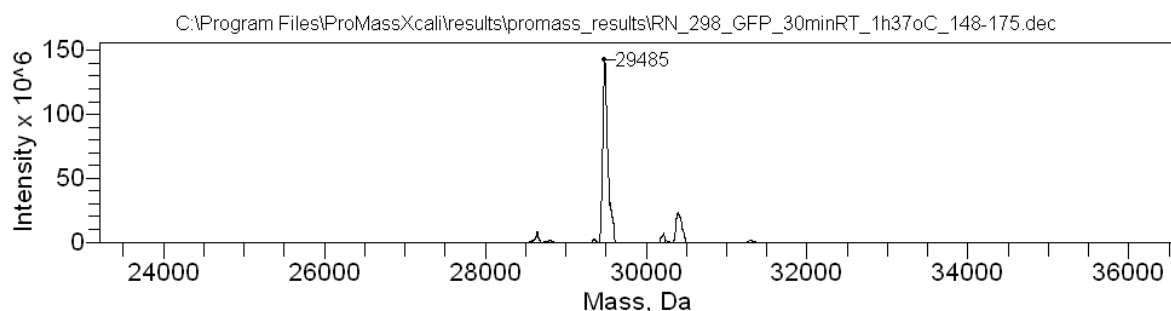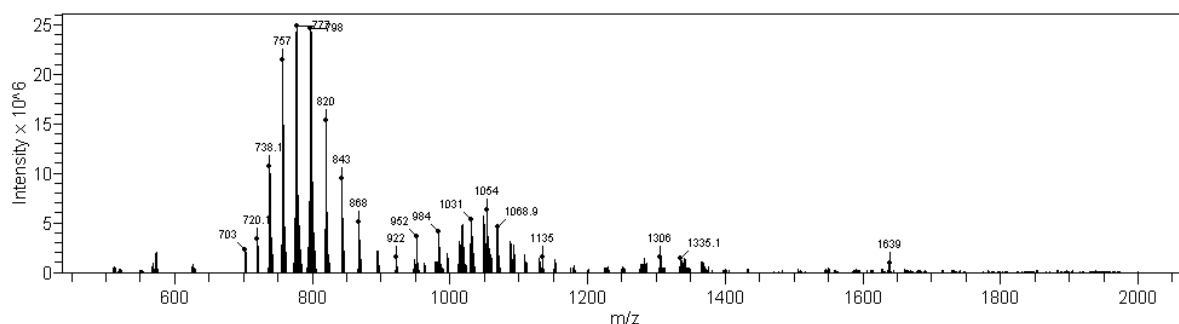

## Optimization of formation of sulphonium 8

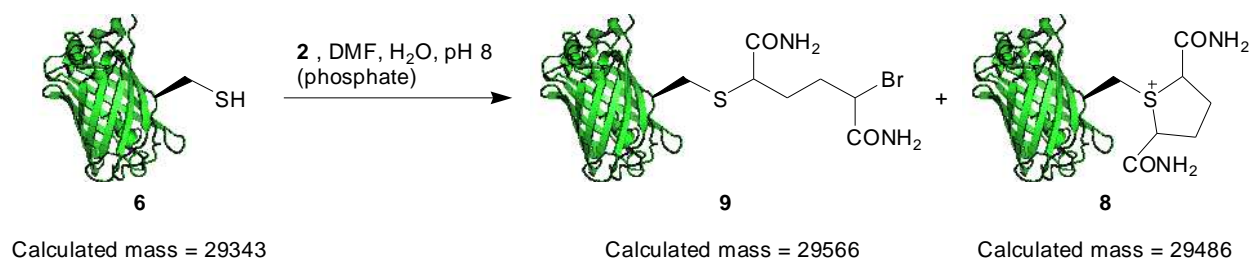

2,5-Dibromohexanediamide (**2**) (10, 25 or 50 equivalents), as a solution in DMF (\*\* mL), was added to a solution of GFP(S147C) (100  $\mu\text{L}$ , 1.0 mg/mL) in sodium phosphate (100 mM, pH 8.0) at 21  $^\circ\text{C}$ . The mixture was vortexed for 1 s, maintained at the required temperature (4  $^\circ\text{C}$ , 21  $^\circ\text{C}$  or 37  $^\circ\text{C}$ ) for the prescribed time (2 h, 5 h or 20 h) and analyzed by LCMS.

10 equivalents, 21  $^\circ\text{C}$

2 h

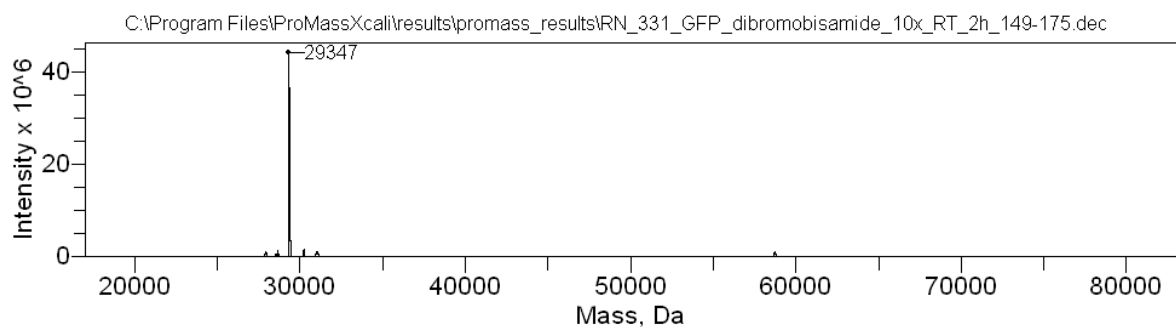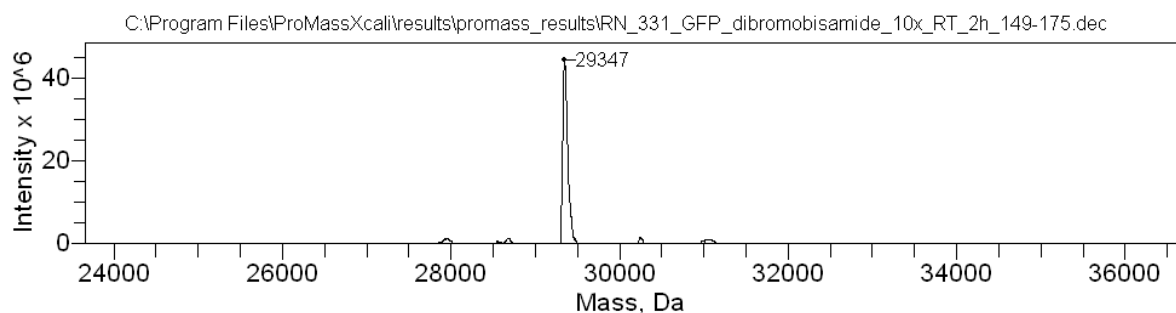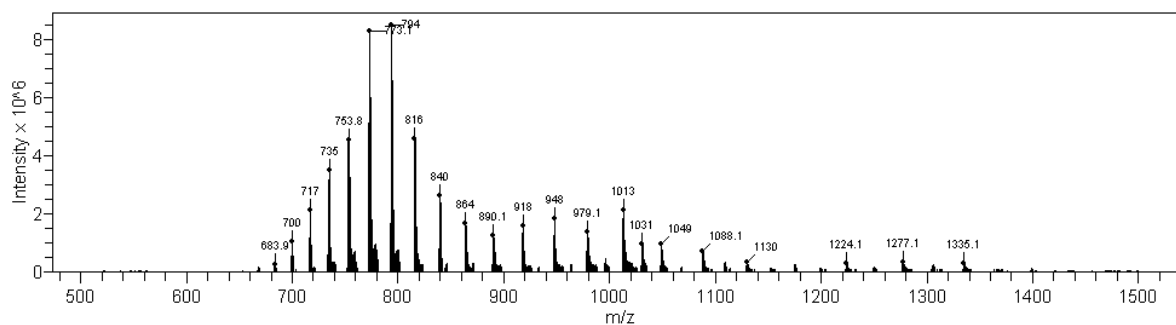

5 h

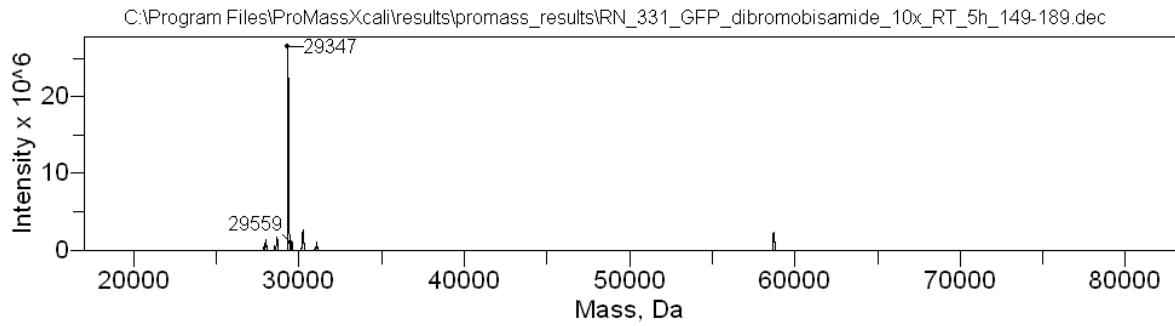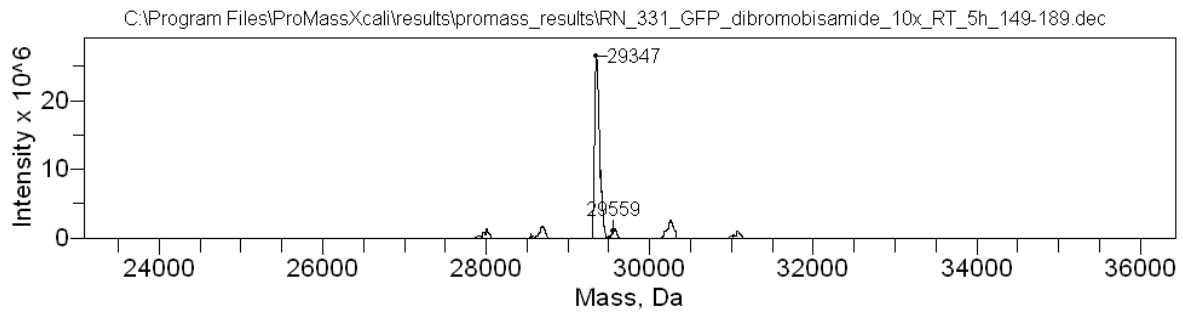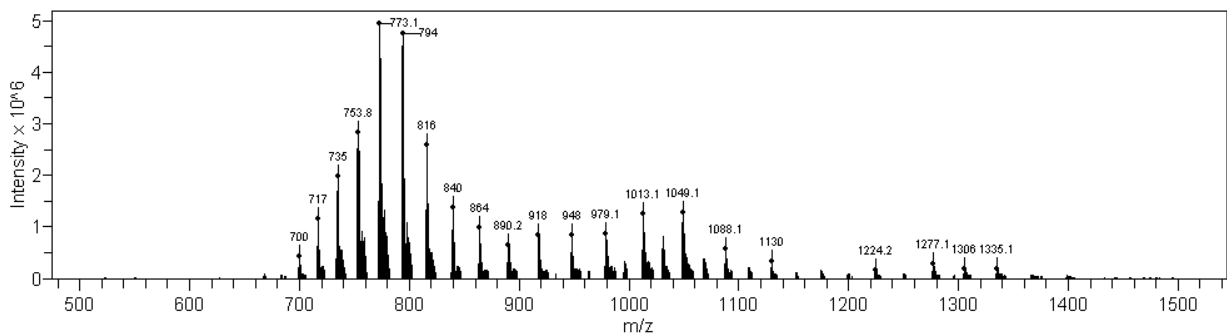

20 h

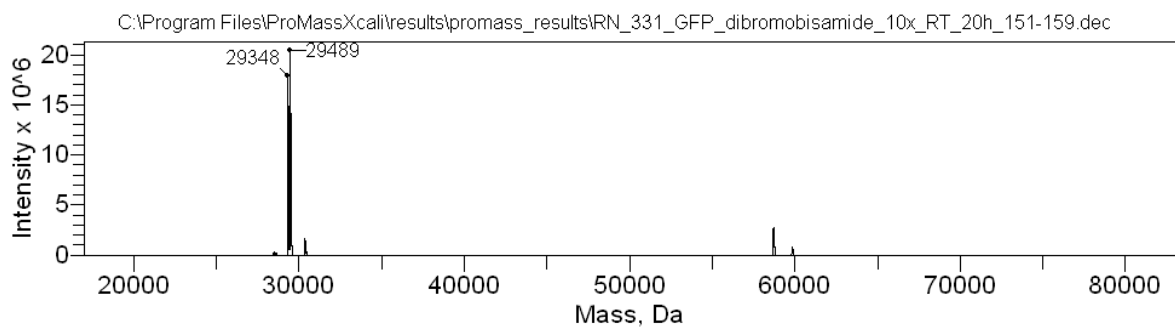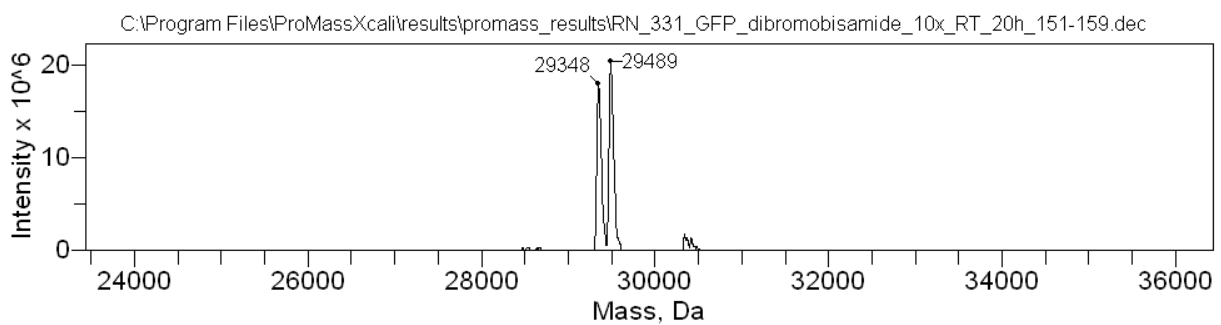

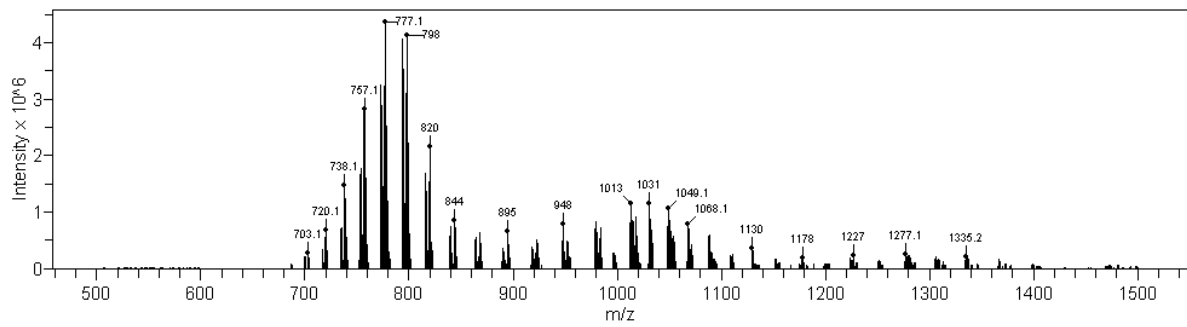

25 equivalents, 21 °C

2 h

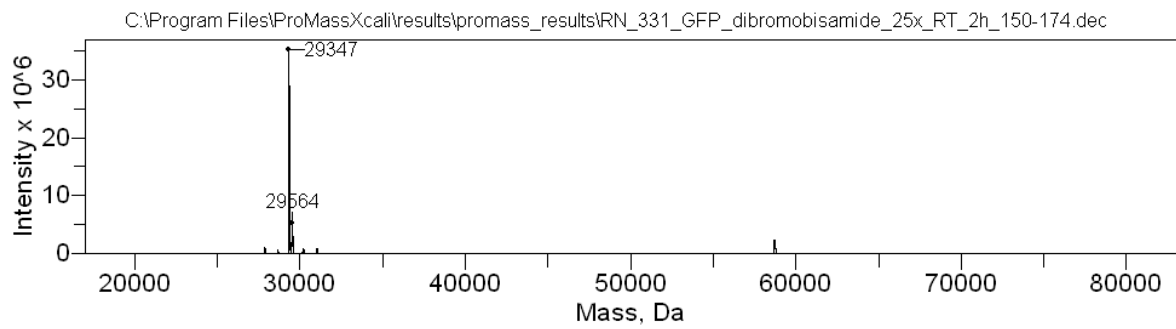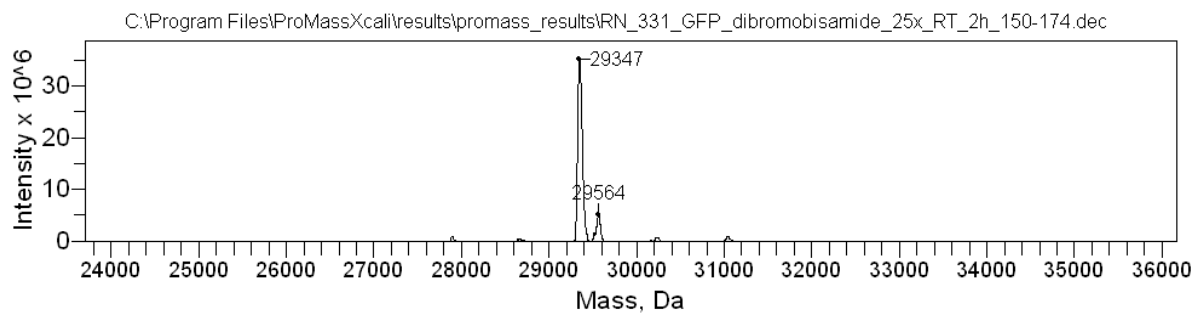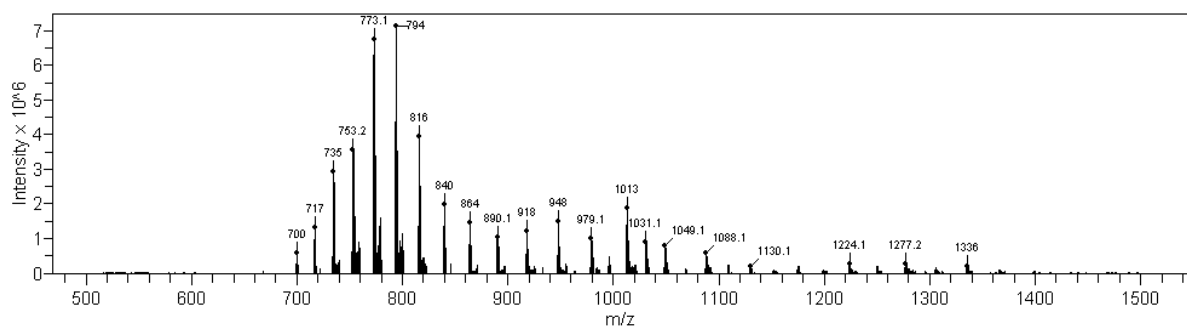

5 h

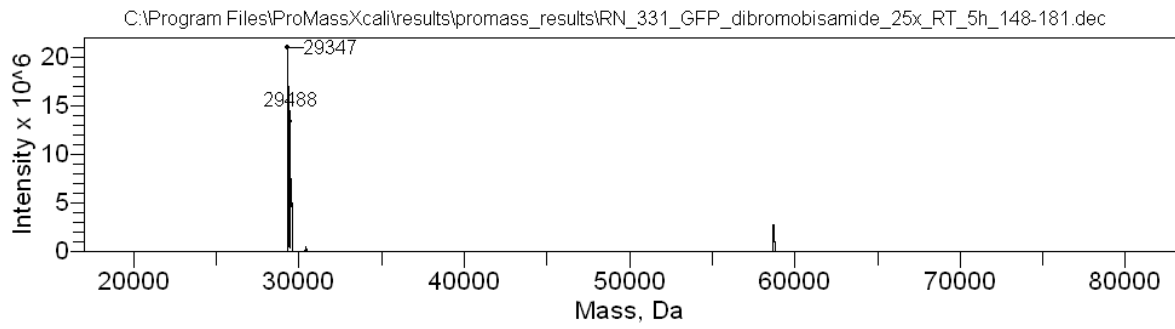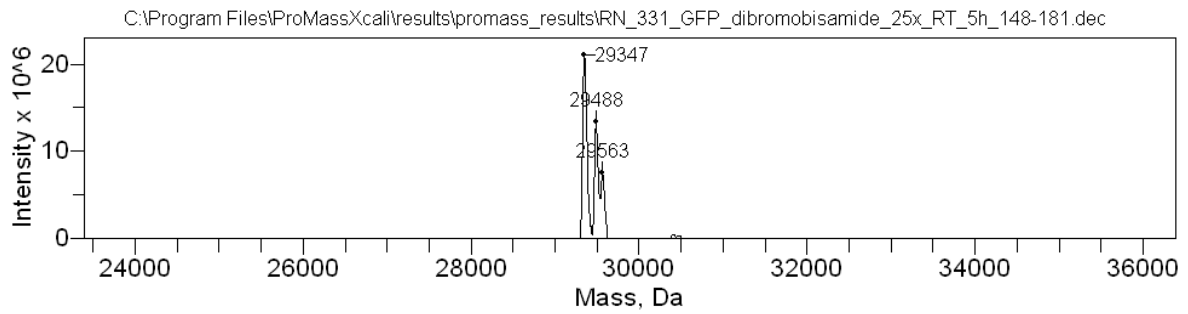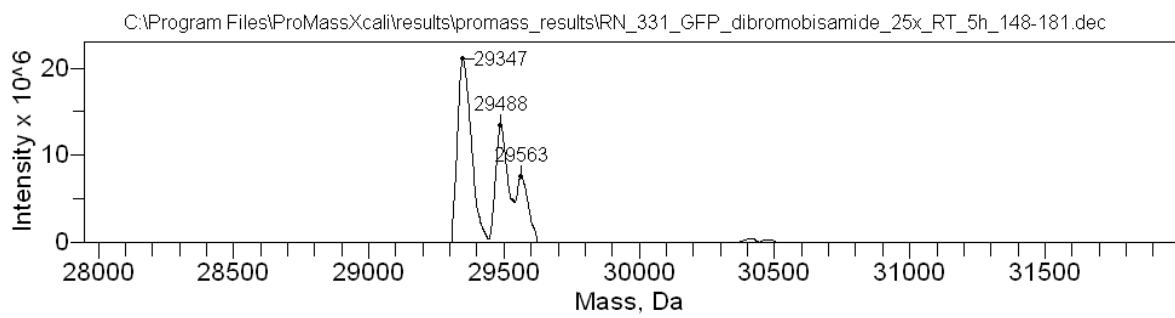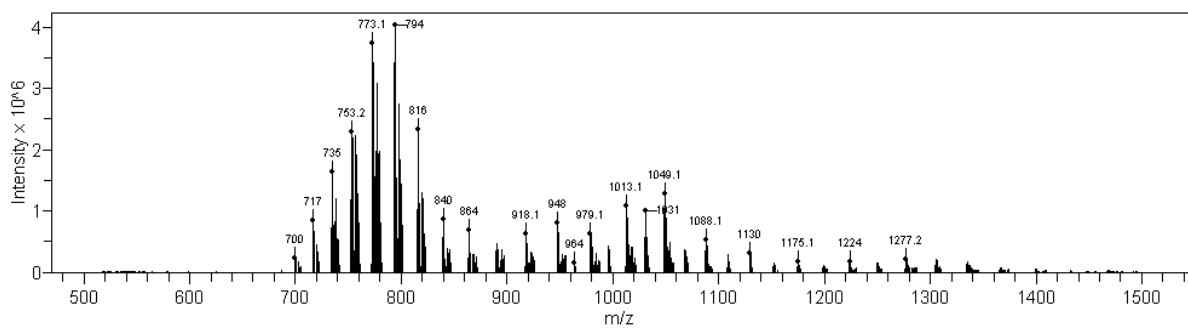

20 h

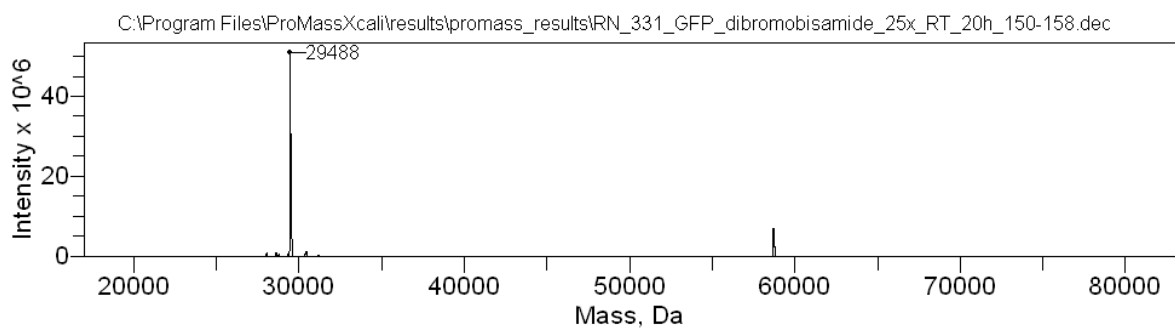



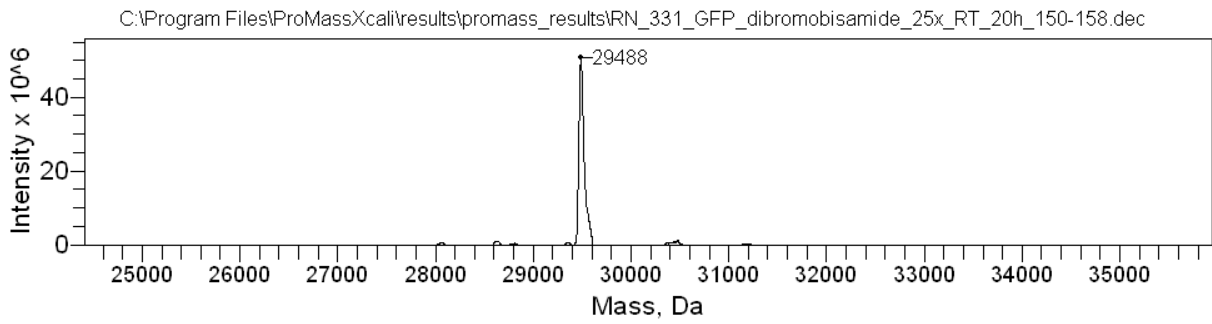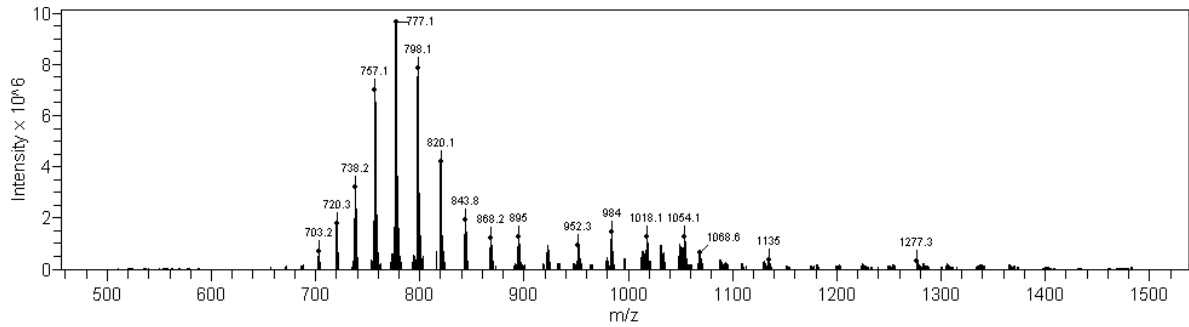

50 equivalents, 21 °C

2 h

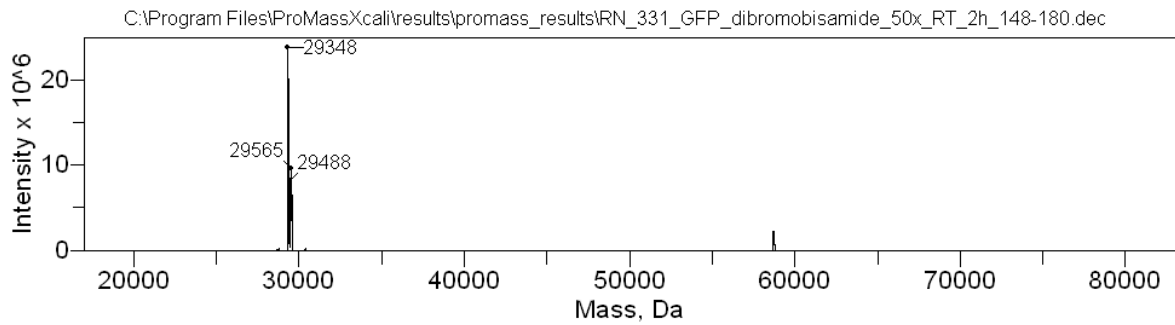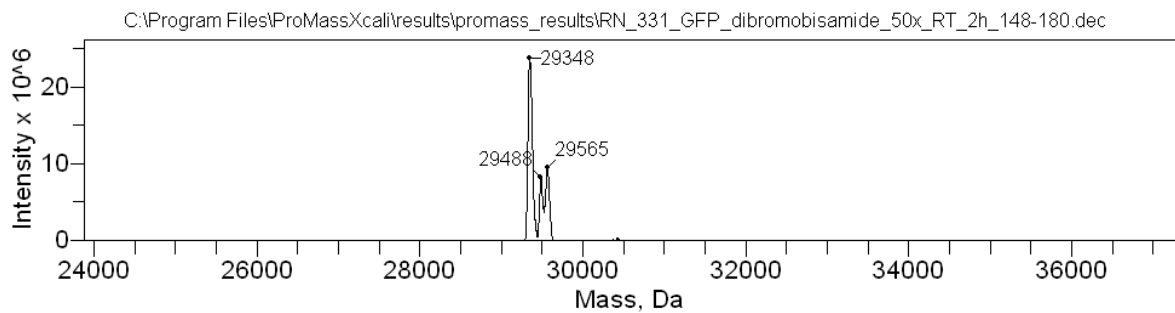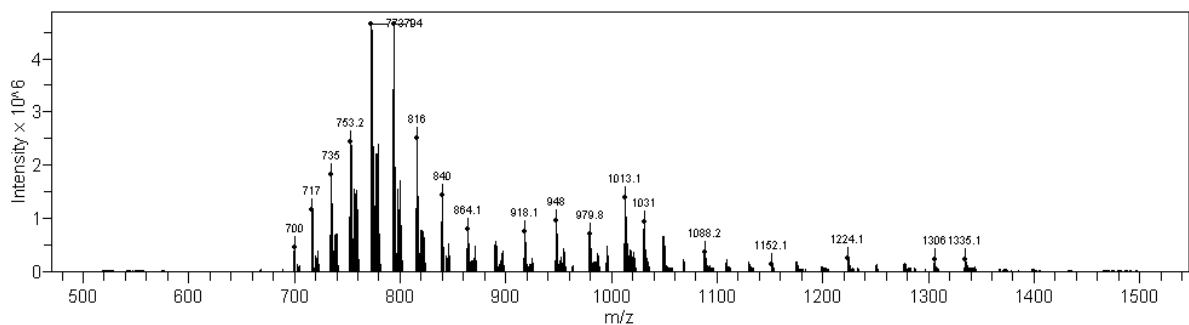

5 h

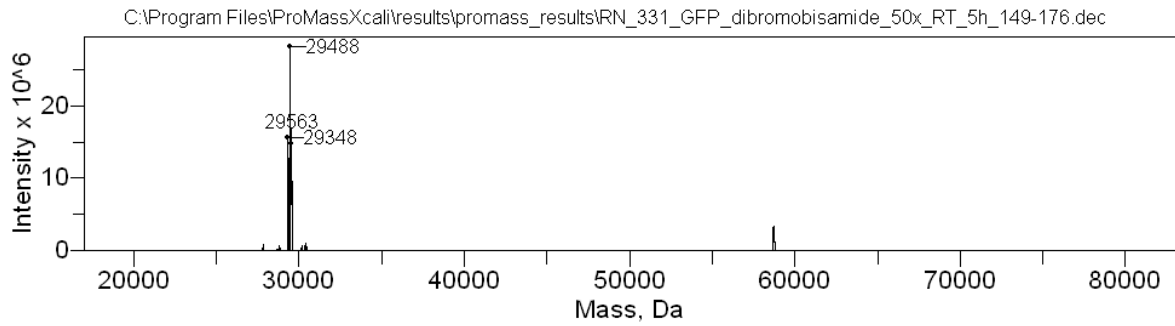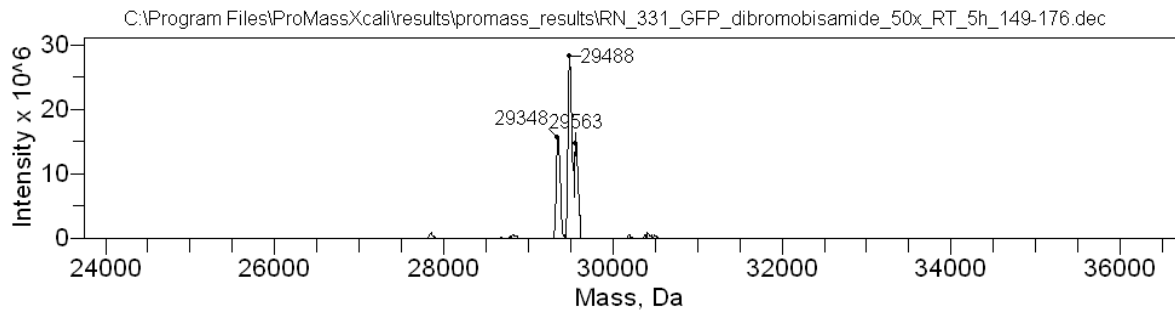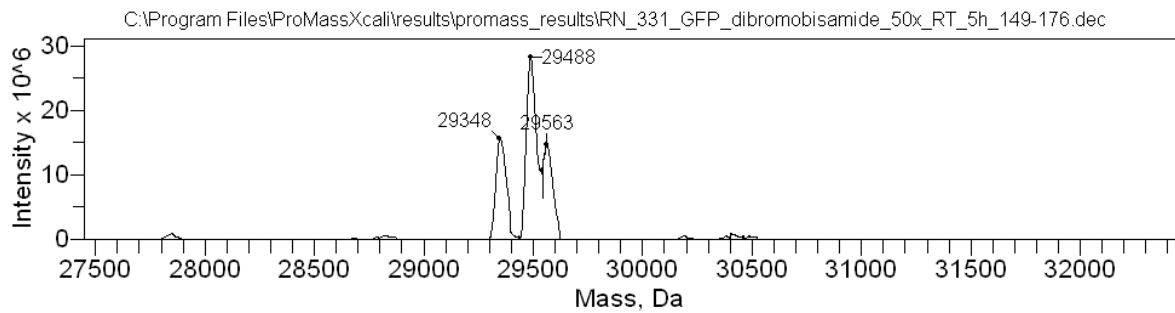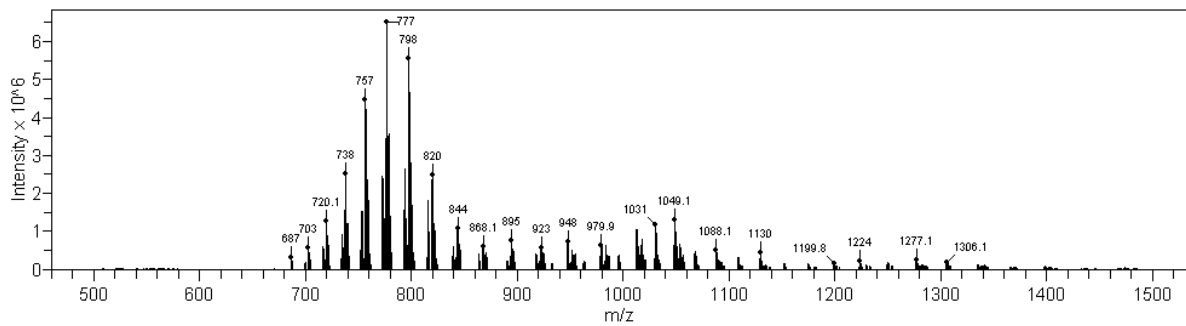

20 h

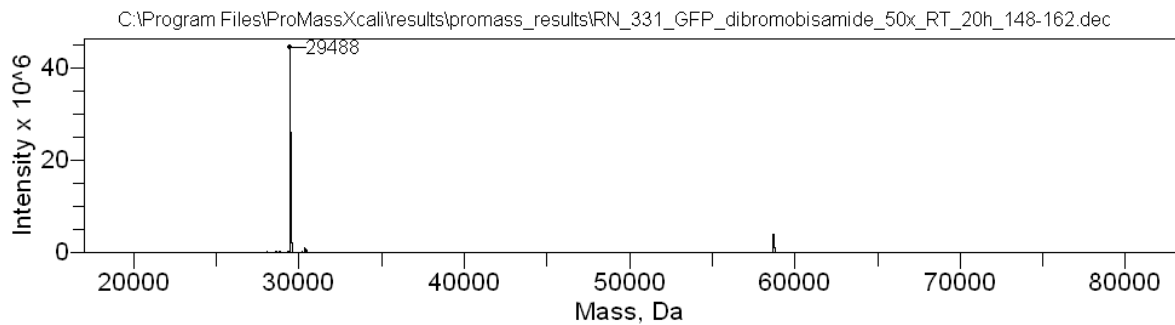

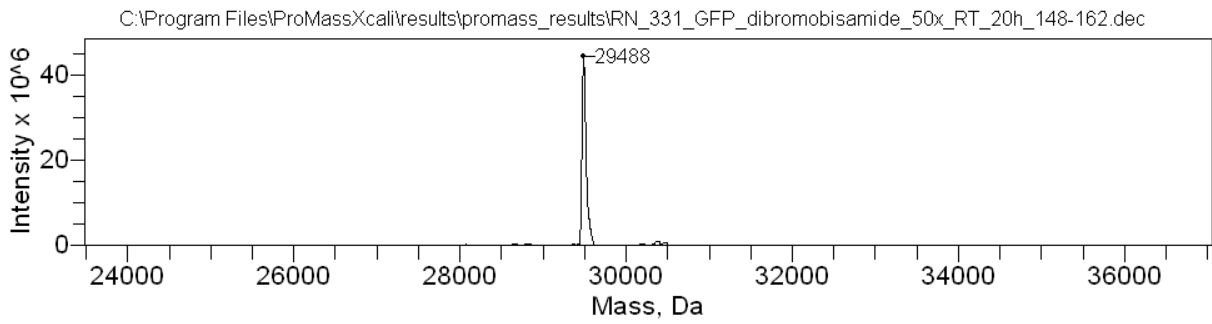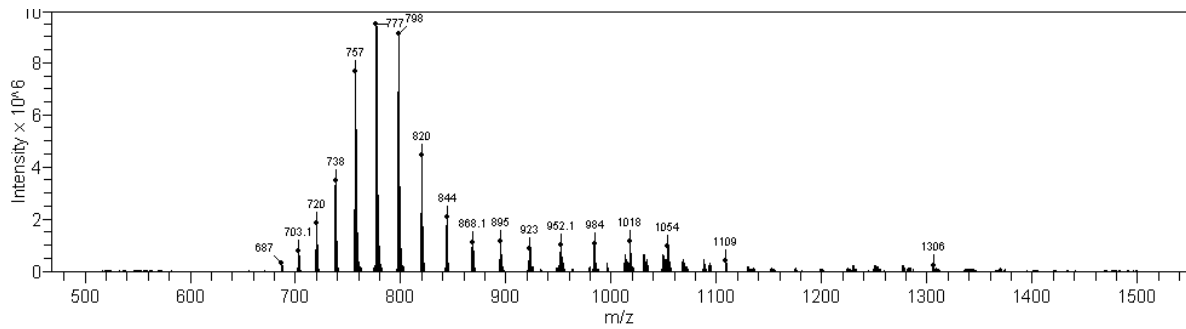

10 equivalents, 4 °C, 20 h

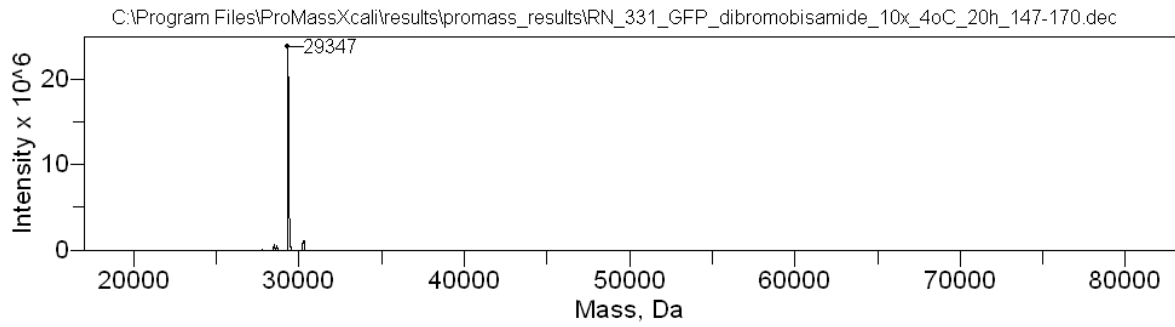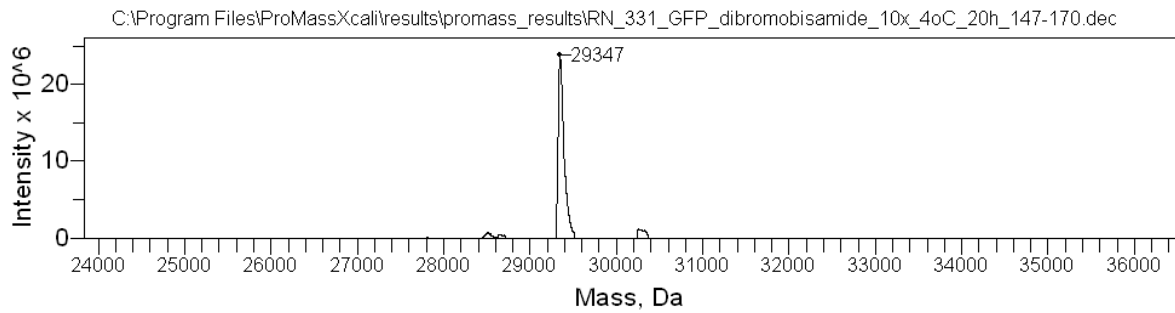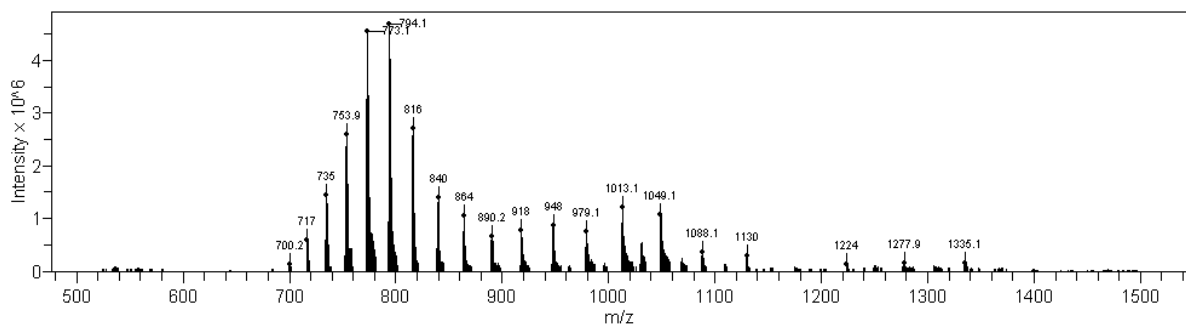

25 equivalents, 4 °C, 20 h

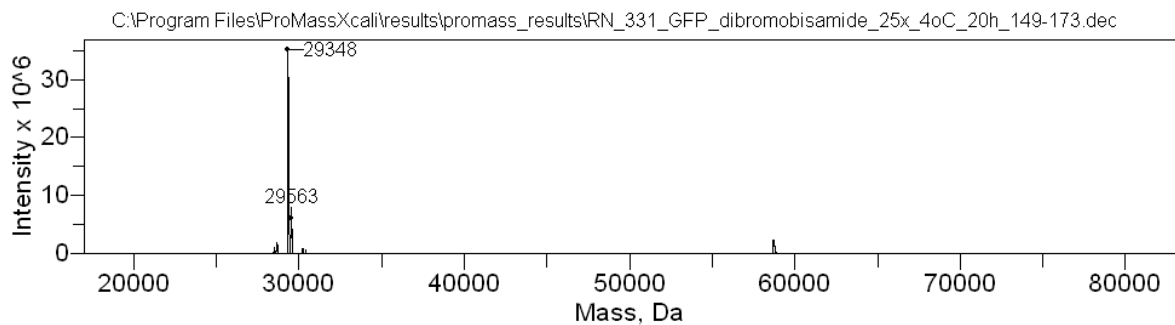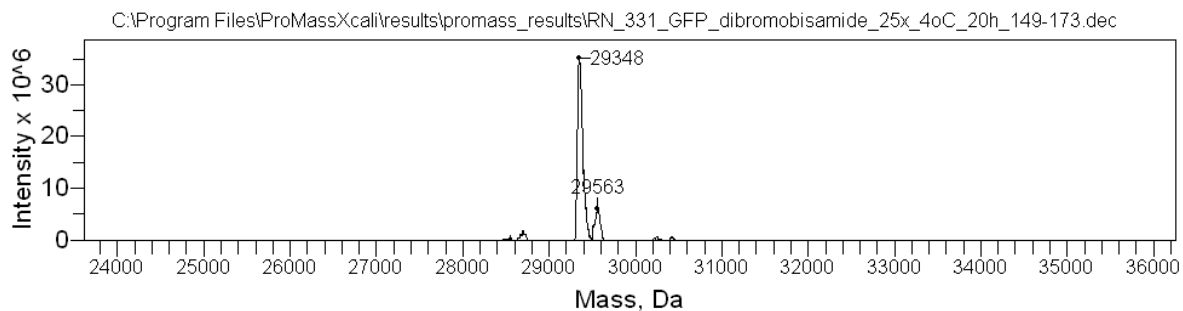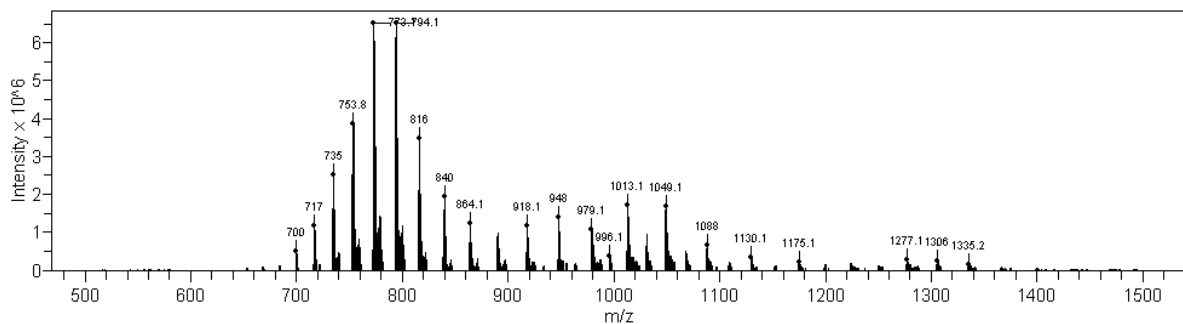

50 equivalents, 4 °C, 20 h

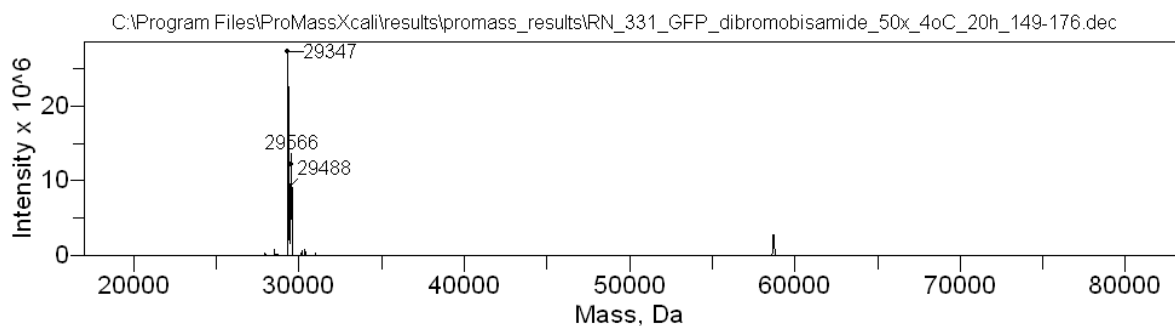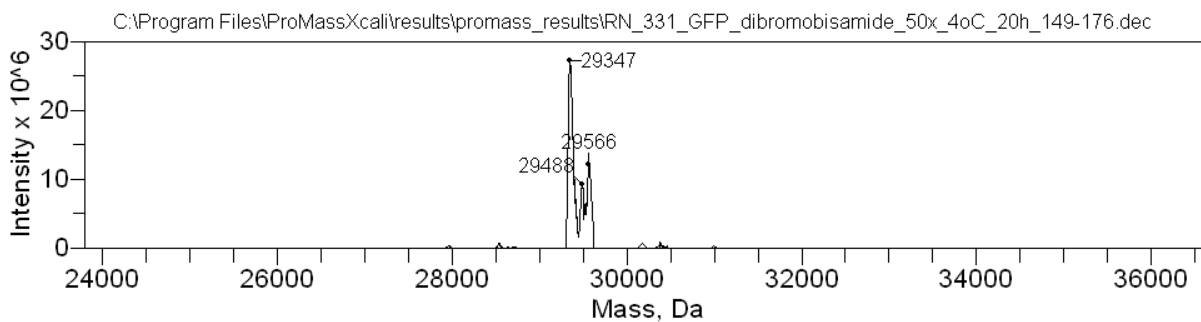

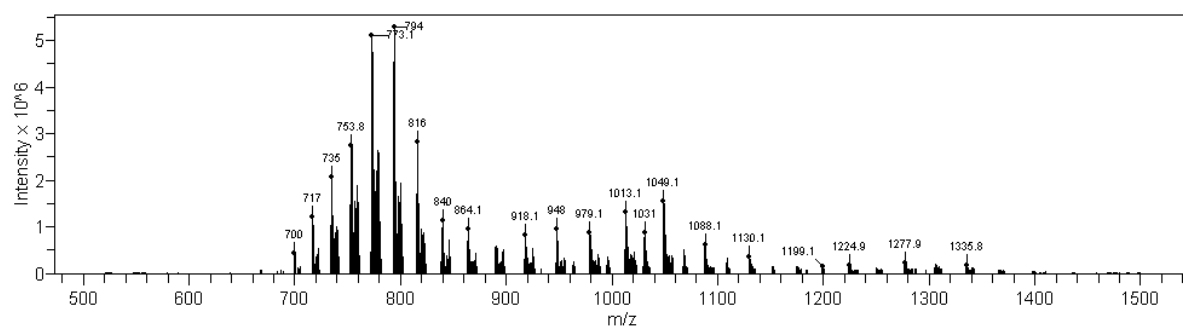

50 equivalents, 37 °C, 2 h

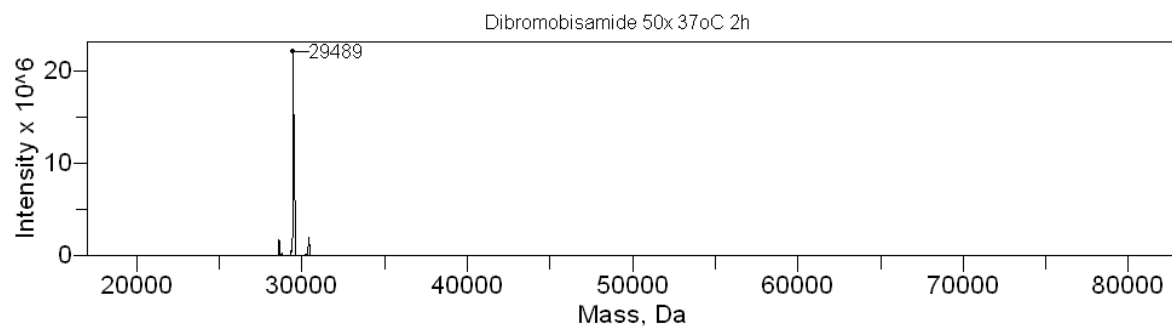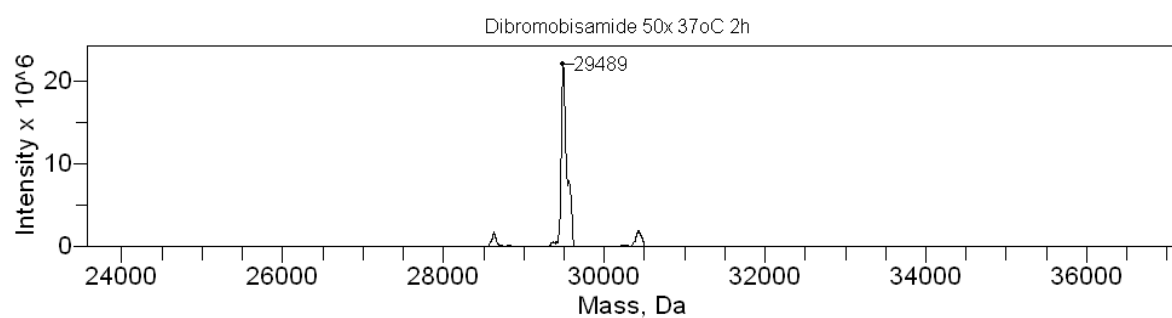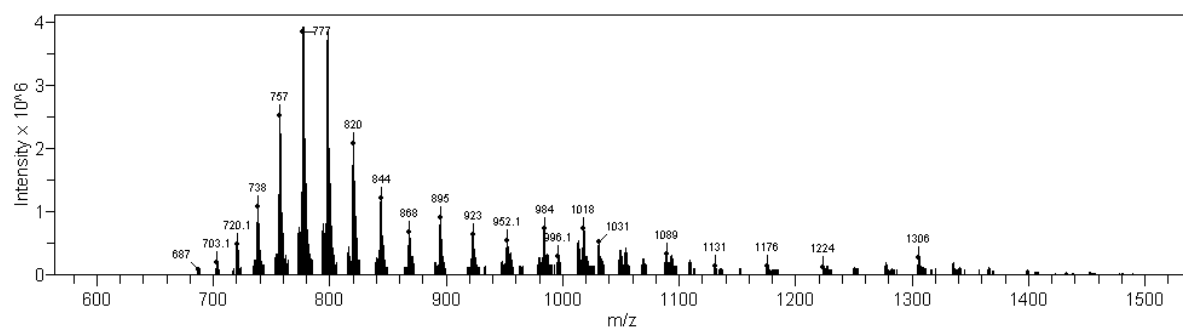

## Synthesis of sulphonium **8**

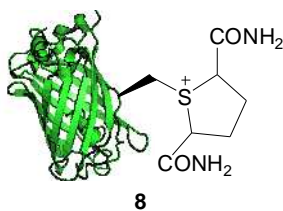

Calculated mass = 29486

2,5-Dibromohexanediamide (**2**) (17 mM solution in DMF, 50 equivalents) was added to a solution of GFP(S147C) (1.0 mg/mL) in sodium phosphate (100 mM, pH 8.0) at 21 °C. The mixture was vortexed for 1 s and then maintained at 21 °C for 20 h. Analysis by LCMS indicated complete formation of sulphonium **8**. Excess 2,5-dibromohexanediamide (**2**) was removed by repeated diafiltration into fresh buffer (100mM sodium phosphate, pH 8.0) using VivaSpin sample concentrators (GE Healthcare, 10,000 MWCO) and analyzed by LCMS.

The solution of sulphonium **8** sufficiently stable to be at 4 °C for 1 month

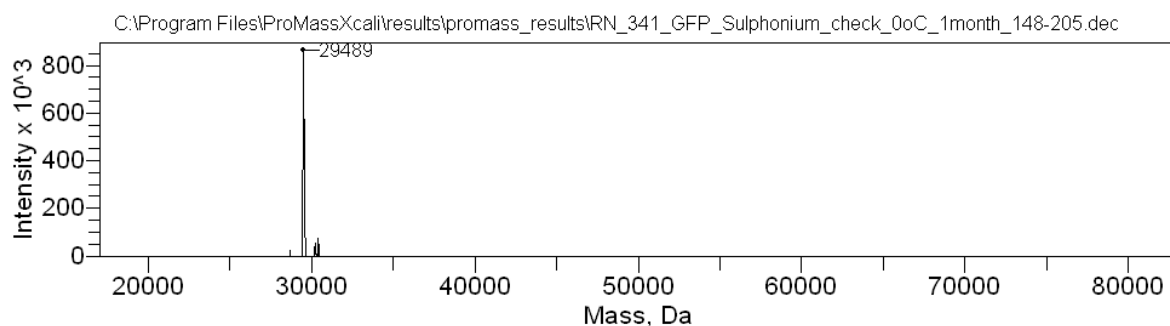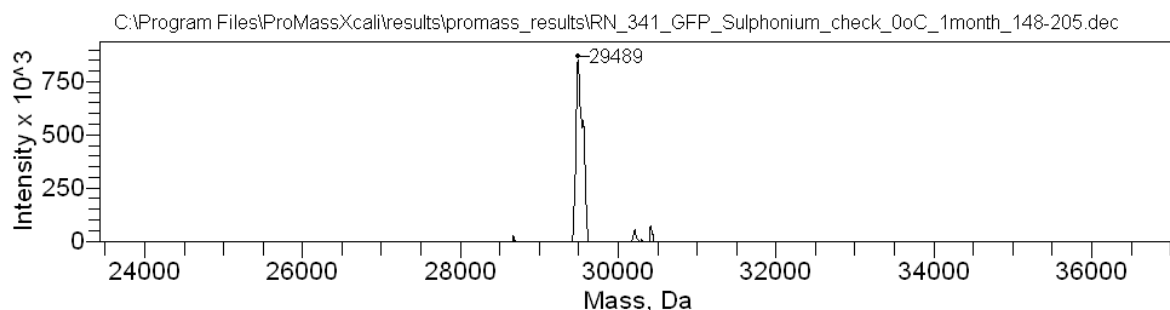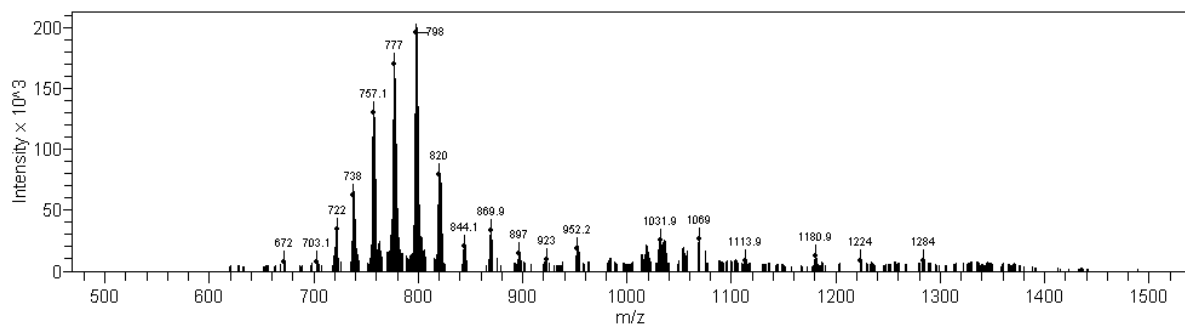

## Reaction of GFP(S147C) 6 with N-methylbromomaleimide

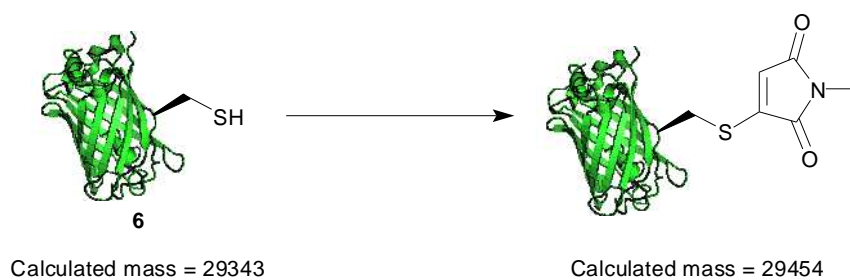

N-Methylbromomaleimide (5  $\mu$ L, 6.8 mM solution in DMF, 1 equivalent) was added to a solution of GFP(S147C) 6 (100  $\mu$ L, 1.0 mg/mL) in sodium phosphate (100 mM, pH 8.0) at 21  $^{\circ}$ C. The mixture was vortexed for 1 s, maintained at 21  $^{\circ}$ C for 1 h and analysed by LCMS.

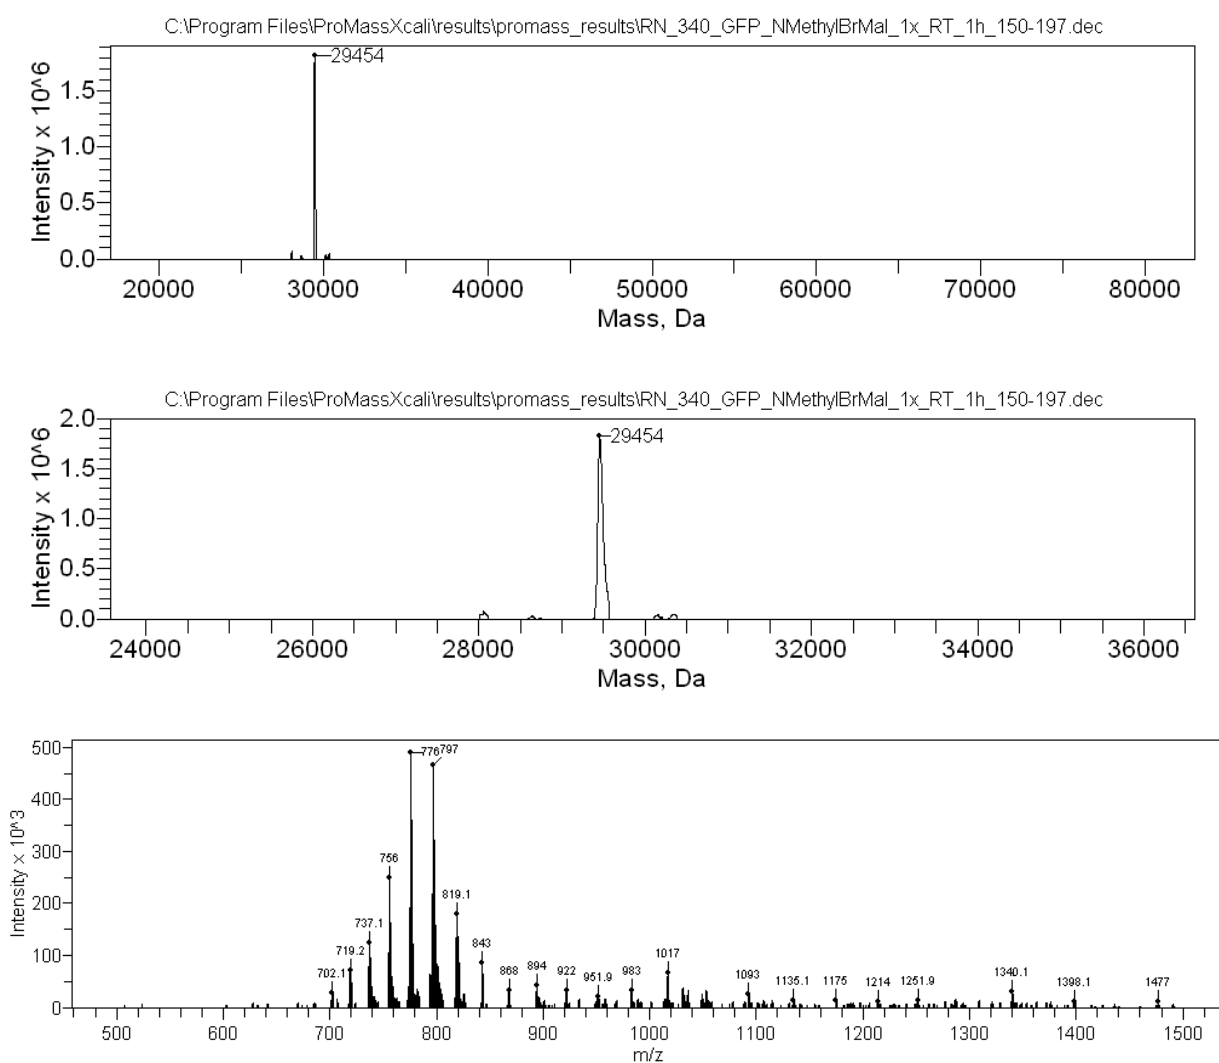

## Reaction of sulphonium **8** with N-methylbromomaleimide

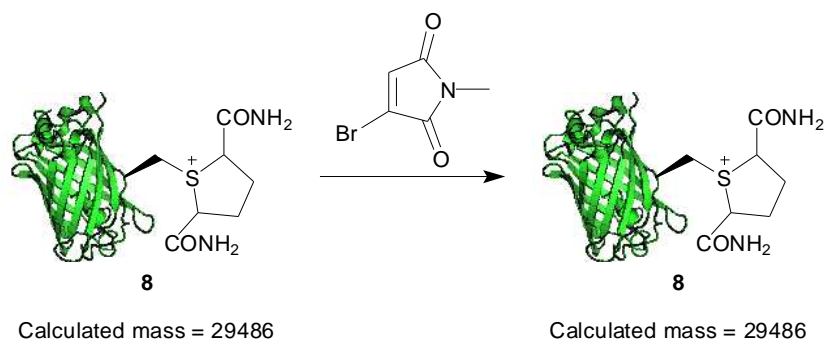

N-methylbromomaleimide (5  $\mu$ L, 6.8 mM solution in DMF, 1 equivalent) was added to a solution of sulphonium **8** (100  $\mu$ L, 1.0 mg/mL) in sodium phosphate (100 mM, pH 8.0) at 21  $^{\circ}$ C. The mixture was vortexed for 1 s, maintained at 21  $^{\circ}$ C for 1 h and analysed by LCMS.

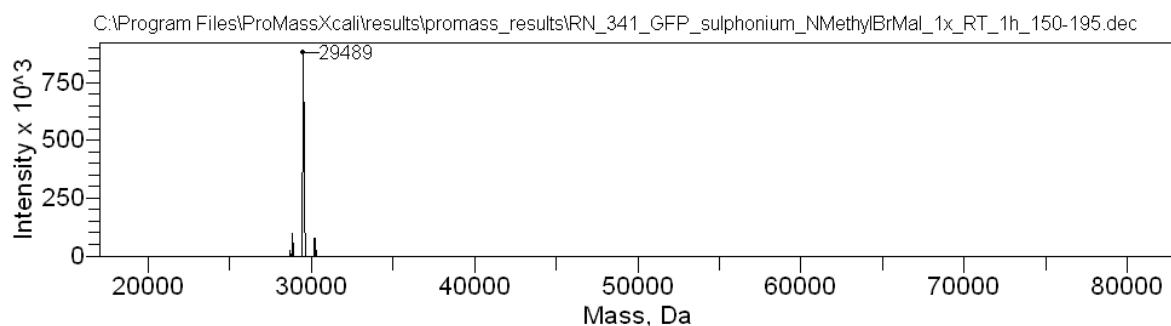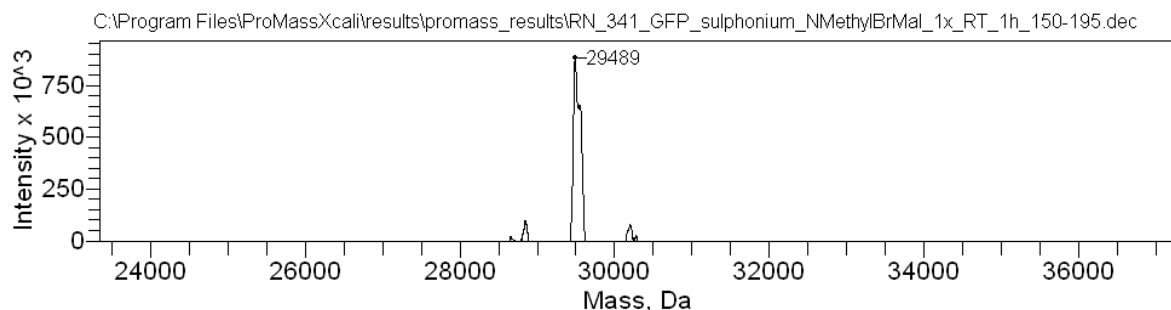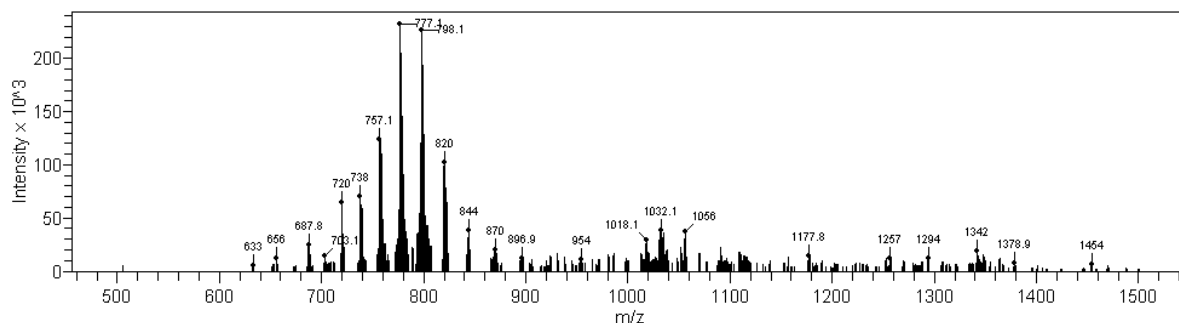



## Reaction of sulphonium **8** with $\beta$ -mercaptoethanol

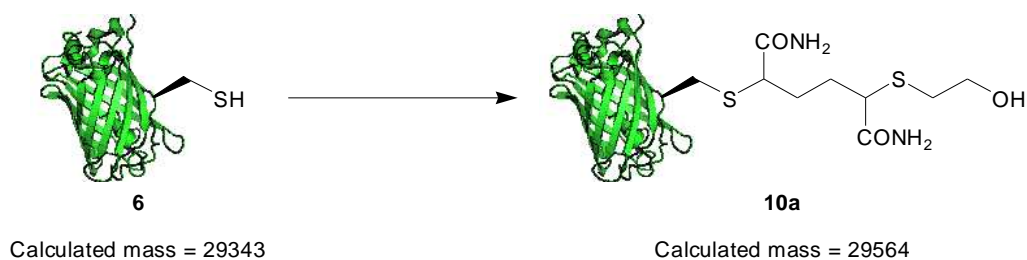

$\beta$ -Mercaptoethanol (5  $\mu$ L, 680 mM solution in H<sub>2</sub>O, 1000 equivalents) was added to a solution of sulphonium **8** (formed from reaction of GFP(S147C) **6** with 2,5-dibromohexanediamide (**2**) (1000 equivalents)). The mixture was vortexed for 1 s, maintained at 37 °C for 2.5 h and analysed by LCMS

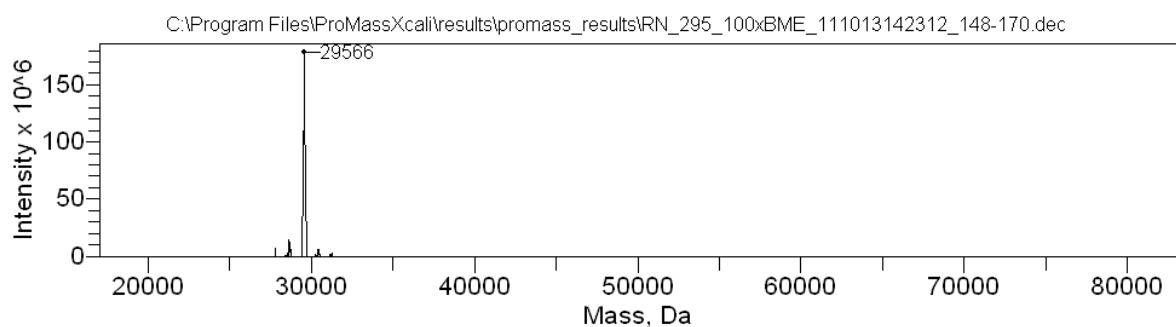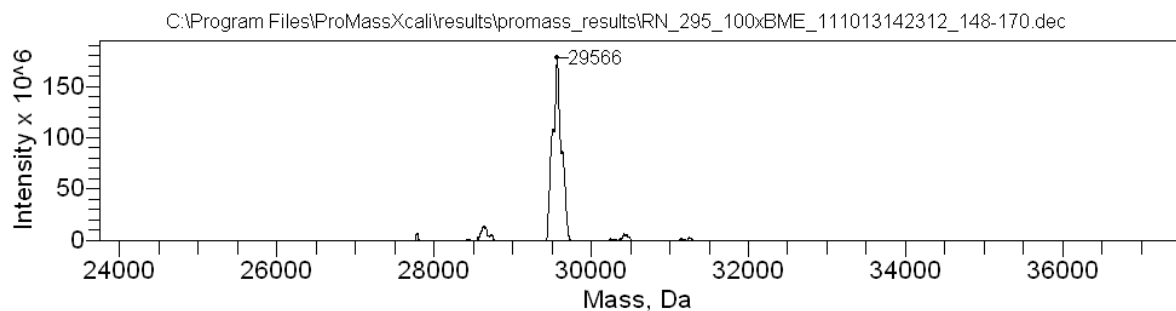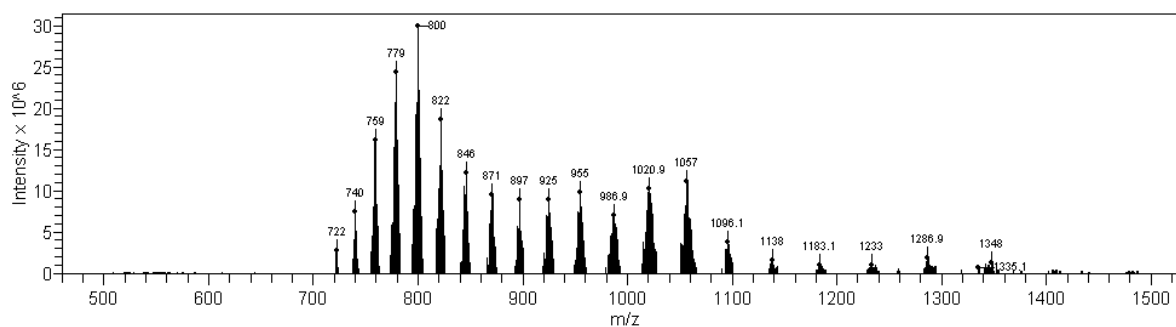

## Reaction of sulphonium **8** with thioglucose

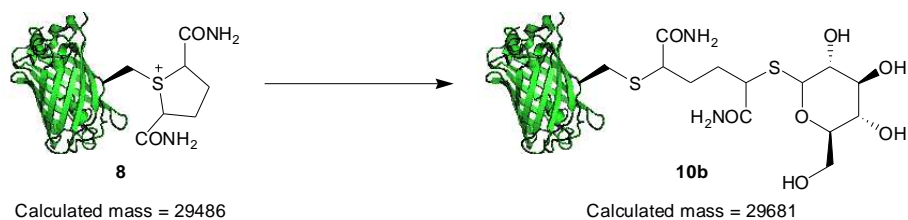

Thioglucose (5  $\mu$ L in H<sub>2</sub>O, 10 or 100 equivalents) was added to a solution of sulphonium **8** (100  $\mu$ L, 1.0 mg/mL) in sodium phosphate (100 mM, pH 8.0) at 21  $^{\circ}$ C. The mixture was vortexed for 1 s, maintained at the required temperature (21 or 37  $^{\circ}$ C) for 5 h and analysed by LCMS

### 10 equivalents, 37 $^{\circ}$ C, 5 h

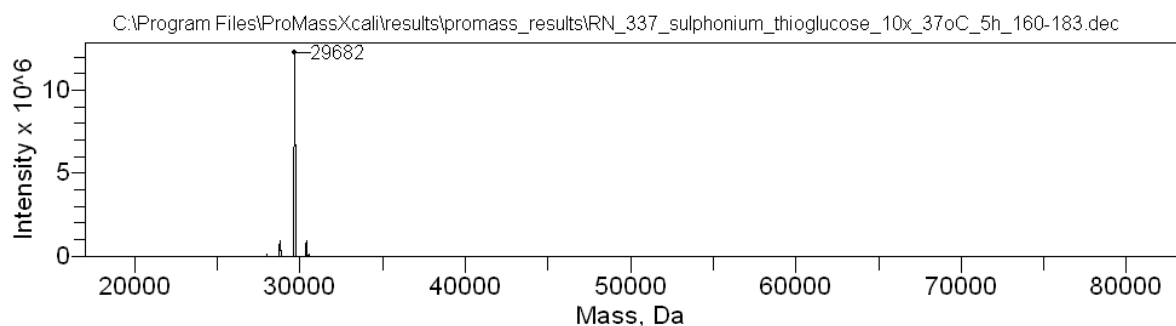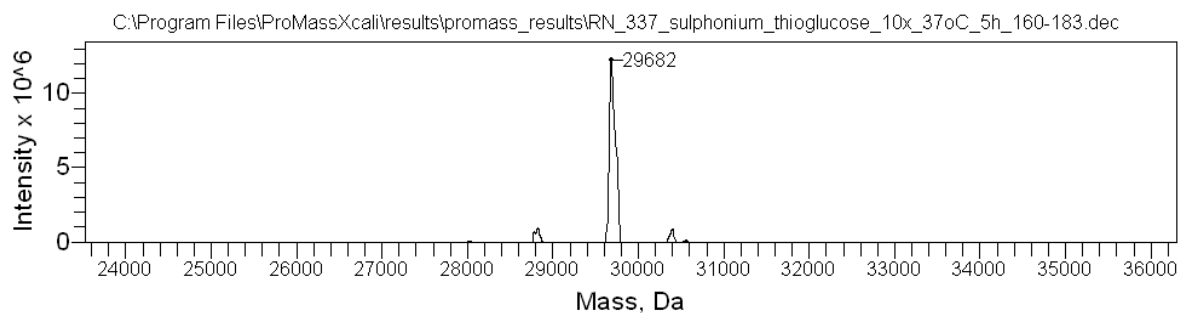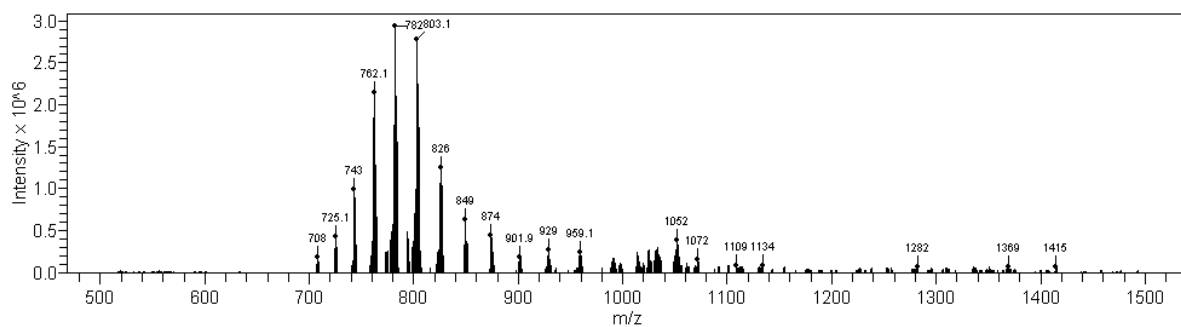

100 equivalents, 21 °C, 5 h

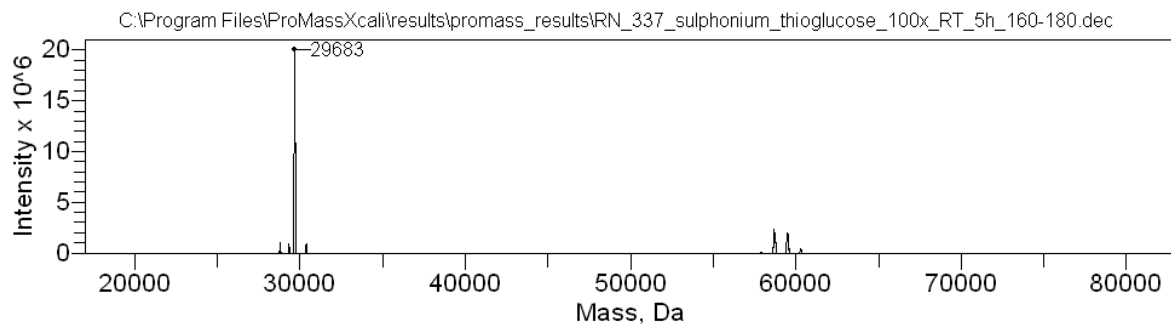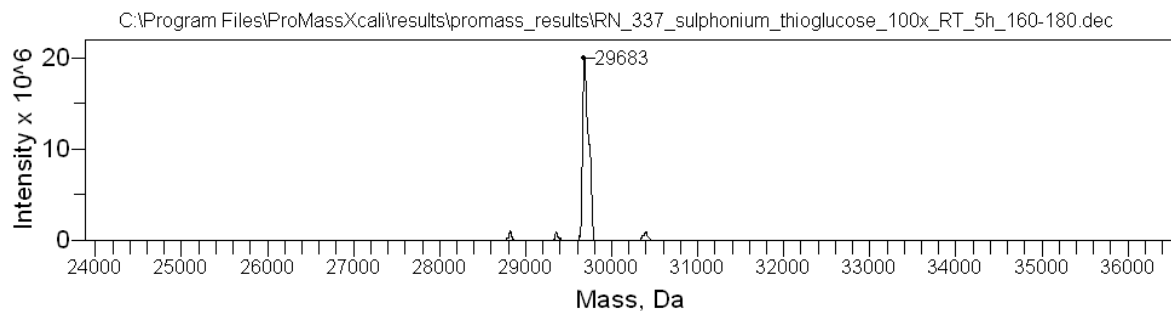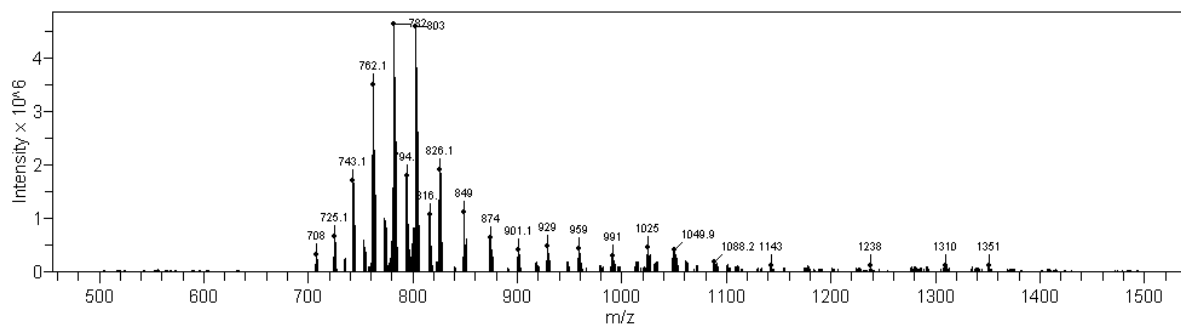

## Reaction of sulphonium **8** with glutathione

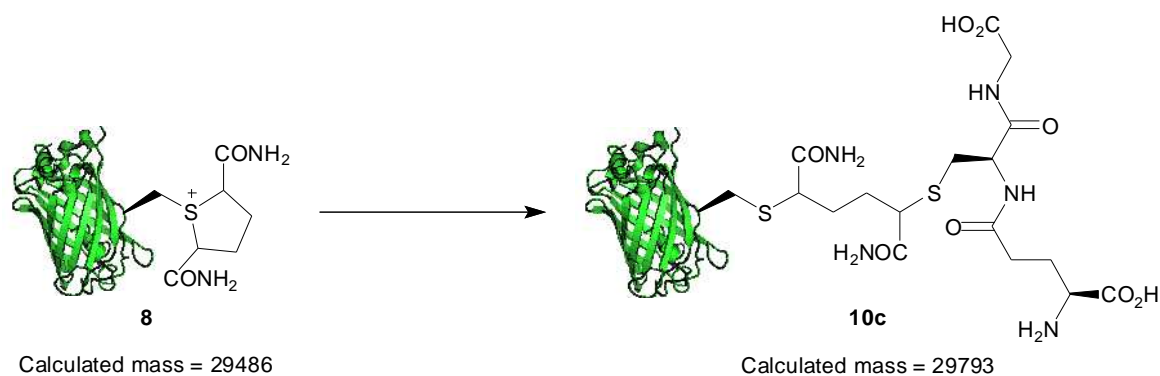

Glutathione (5  $\mu\text{L}$  in  $\text{H}_2\text{O}$ , 10, 100 or 200 equivalents) was added to a solution of sulphonium **8** (100  $\mu\text{L}$ , 1.0 mg/mL) in sodium phosphate (100 mM, pH 8.0) at 21  $^\circ\text{C}$ . The mixture was vortexed for 1 s, maintained at the required temperature (21 or 37  $^\circ\text{C}$ ) for the prescribed time (2 h or 5 h) and analysed by LCMS.

### 10 equivalents, 37 $^\circ\text{C}$ , 5 h

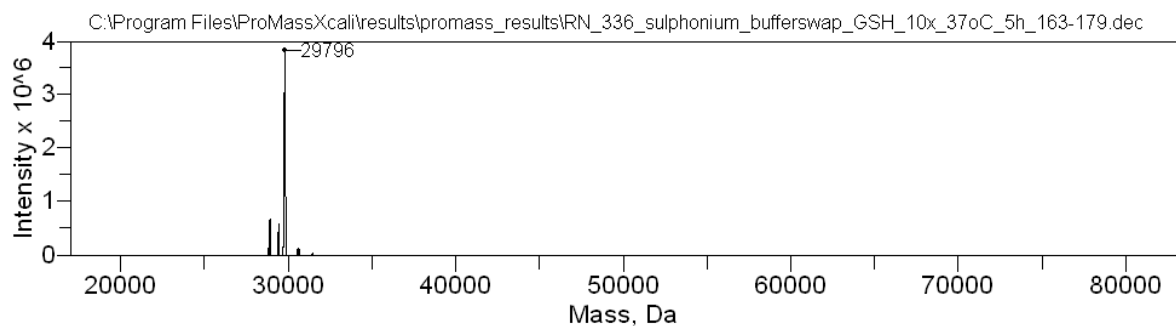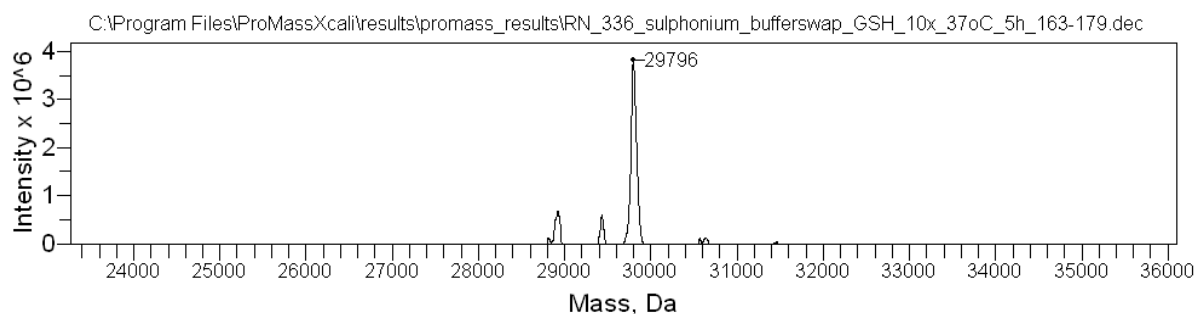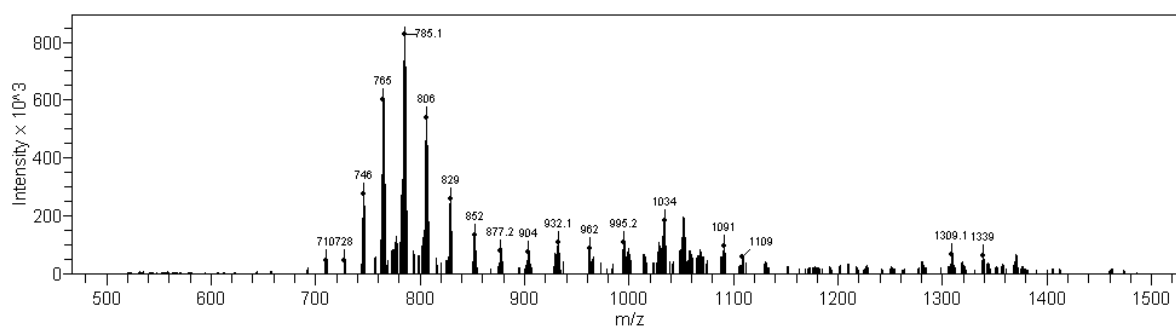

100 equivalents, 21 °C, 5 h

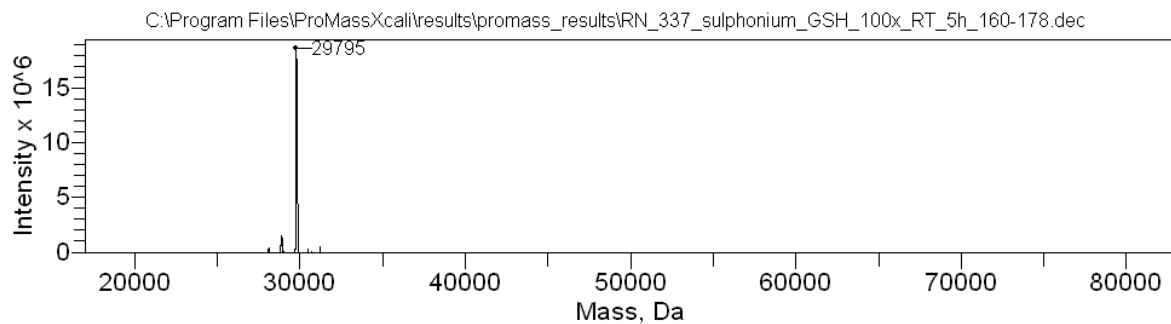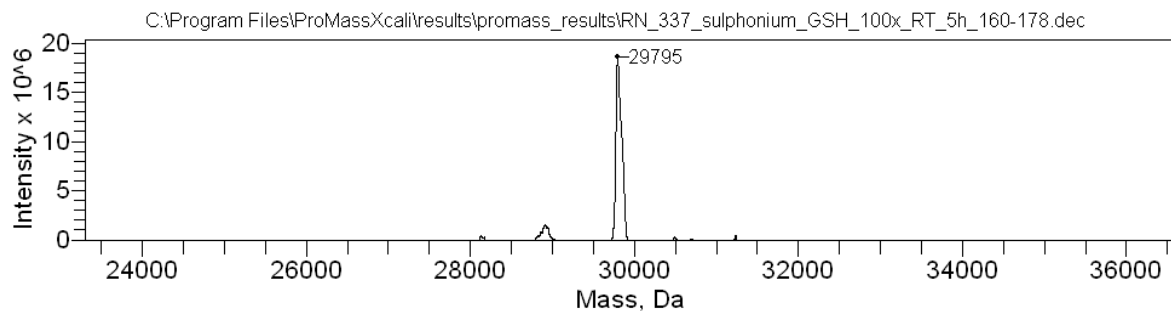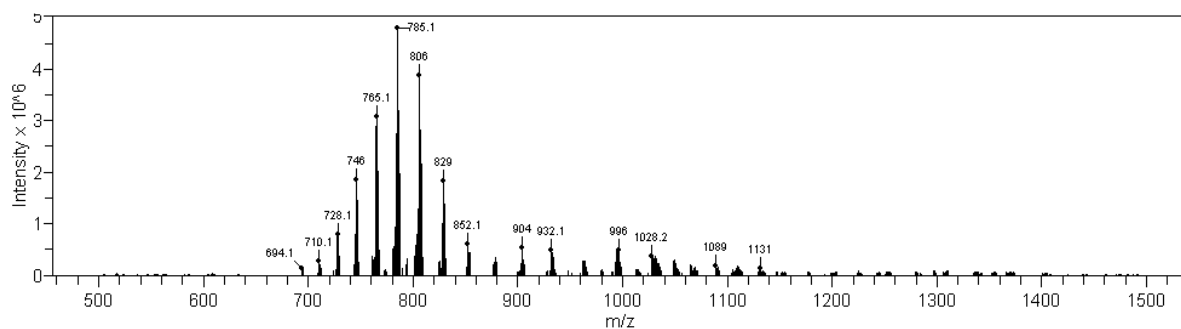

200 equivalents, 37 °C, 2 h

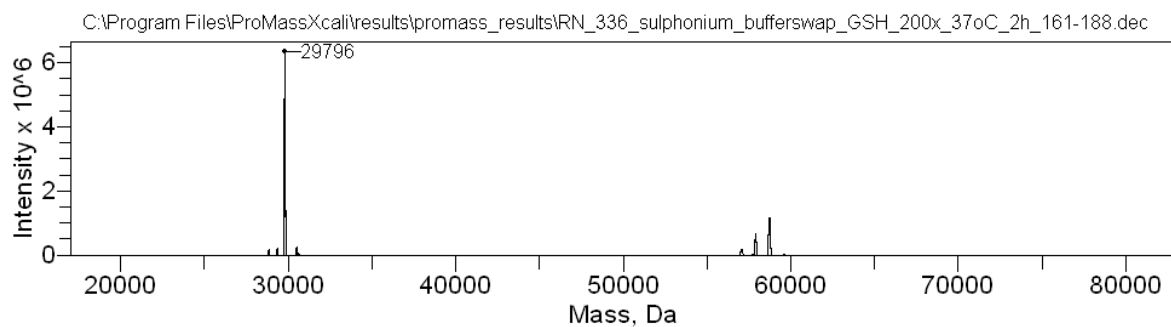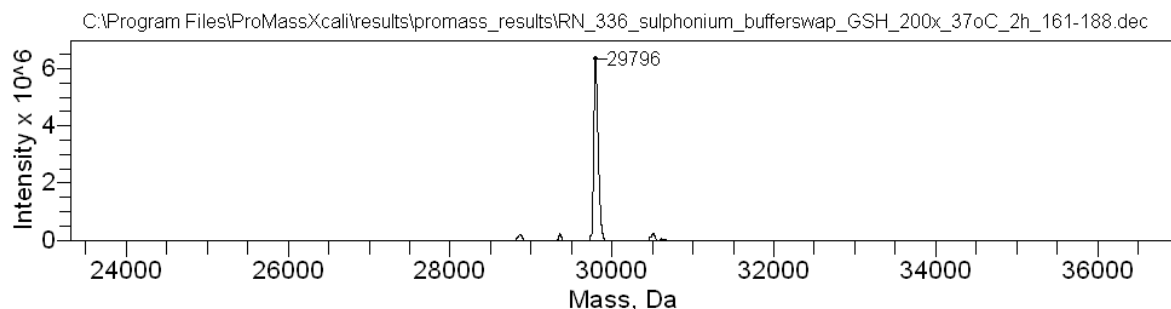

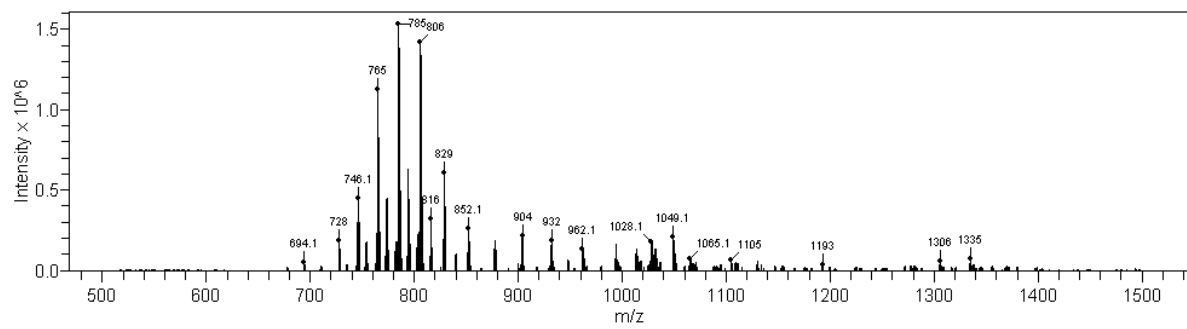

## Reaction of sulphonium **8** with benzeneselenol

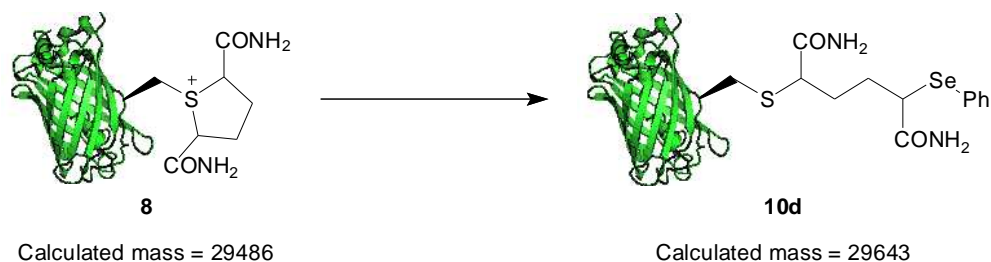

Benzeneselenol (5  $\mu$ L, 68 mM solution in DMF, 100 equivalents) was added to a solution of sulphonium **8** (100  $\mu$ L, 1.0 mg/mL) in sodium phosphate (100 mM, pH 8.0) at 21 °C. The mixture was vortexed for 1s, maintained at the 37 °C for 5 h and analysed by LCMS.

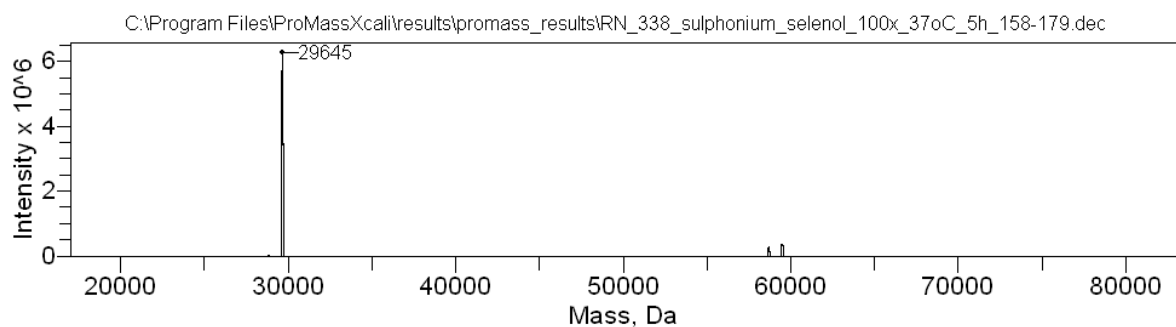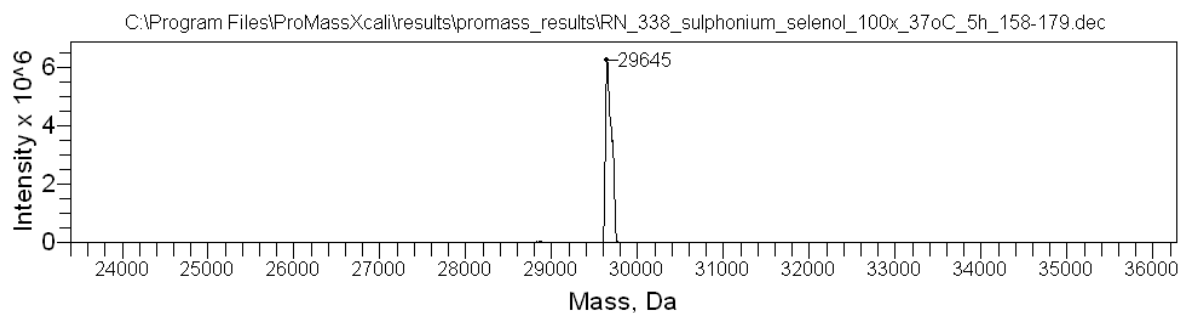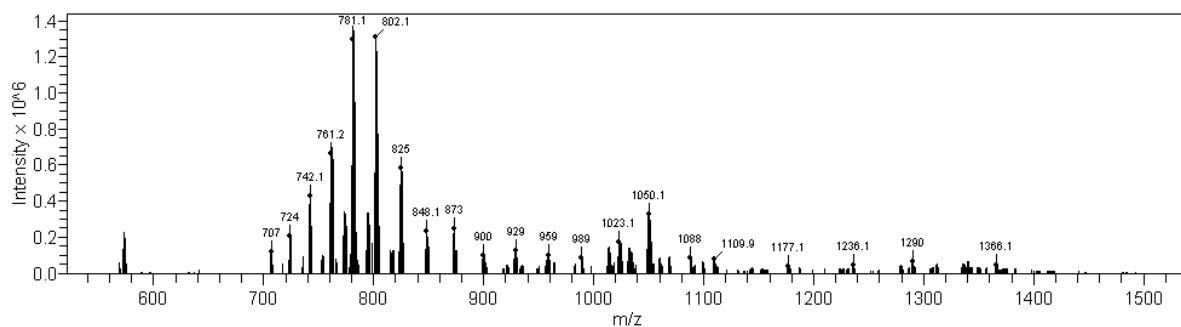

## Reaction of sulphonium **8** with phthalimide

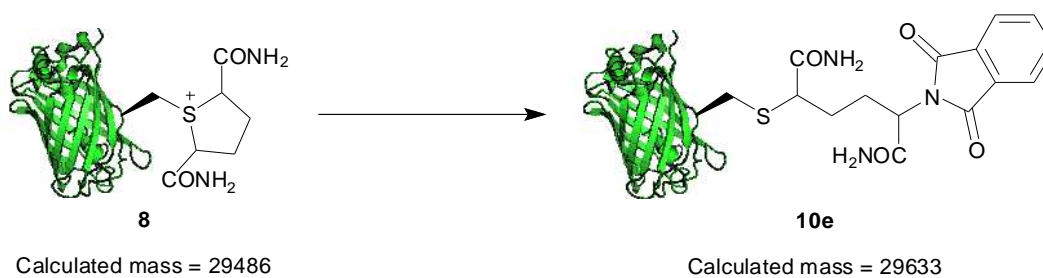

Potassium phthalimide (10  $\mu$ L, 340 mM solution in DMF, 1000 equivalents) was added to a solution of sulphonium **8** (100  $\mu$ L, 1.0 mg/mL) in sodium phosphate (100 mM, pH 8.0) at 21  $^{\circ}$ C. The mixture was vortexed for 1s, maintained at 37  $^{\circ}$ C for 2.5 h and analysed by LCMS.

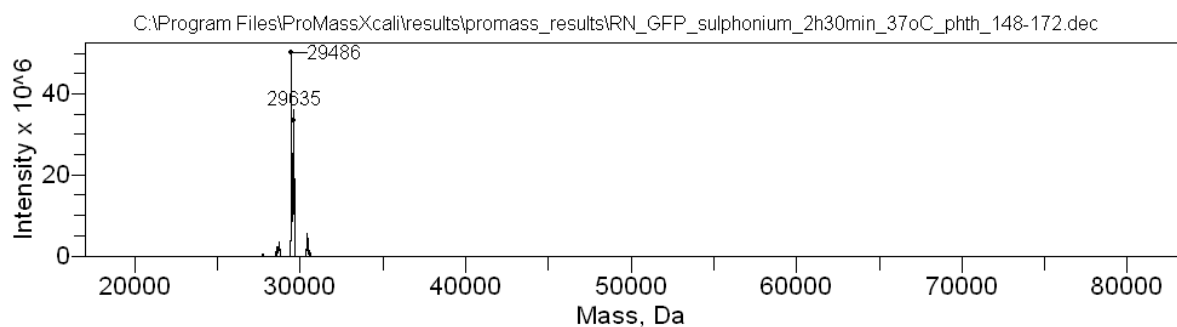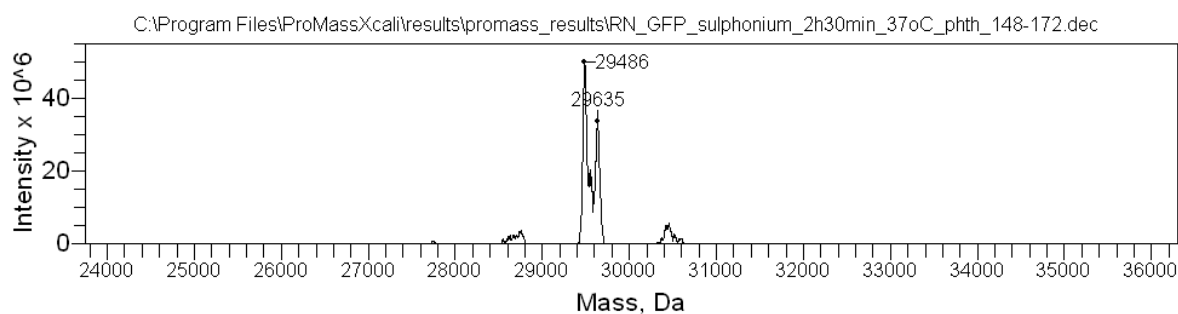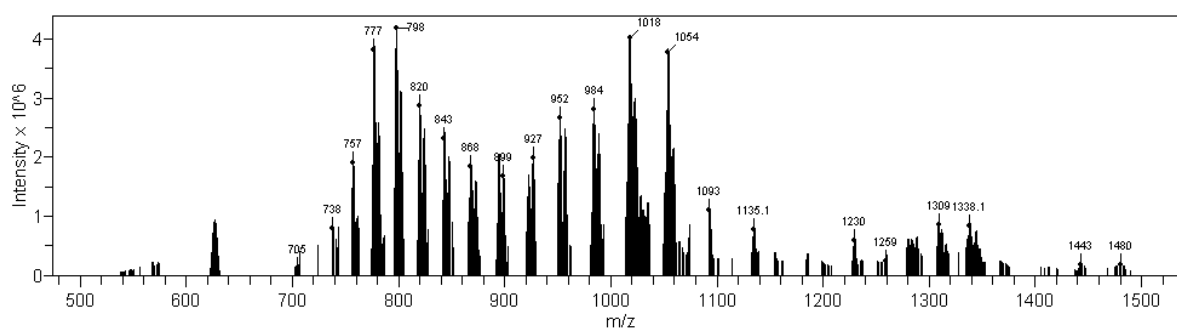



## Reaction of sulphonium **8** with azide

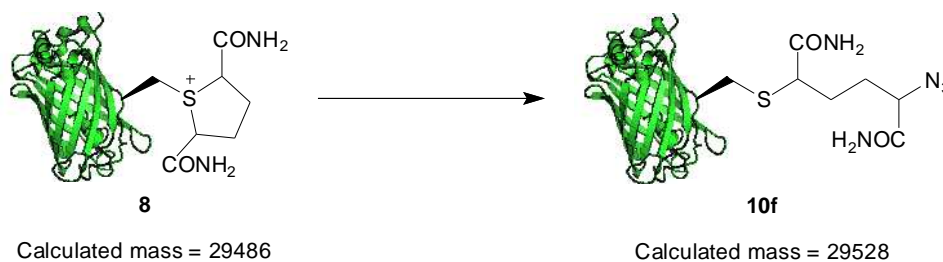

Sodium azide (10  $\mu$ L, 340 mM solution in water, 1000 equivalents) was added to a solution of sulphonium **8** (100  $\mu$ L, 1.0 mg/mL) in sodium phosphate (100 mM, pH 8.0) at 21 °C. The mixture was vortexed for 1s, maintained at 37 °C for 2.5 h and analysed by LCMS.

(Expected Mass : 29528, Observed Mass : 29528)

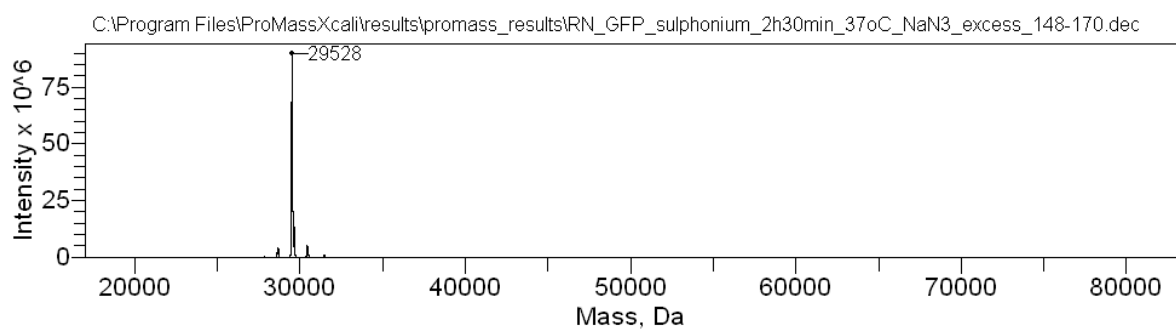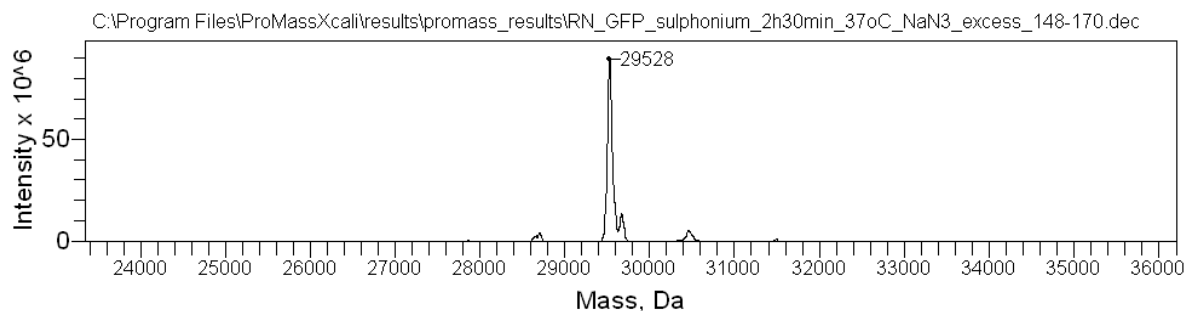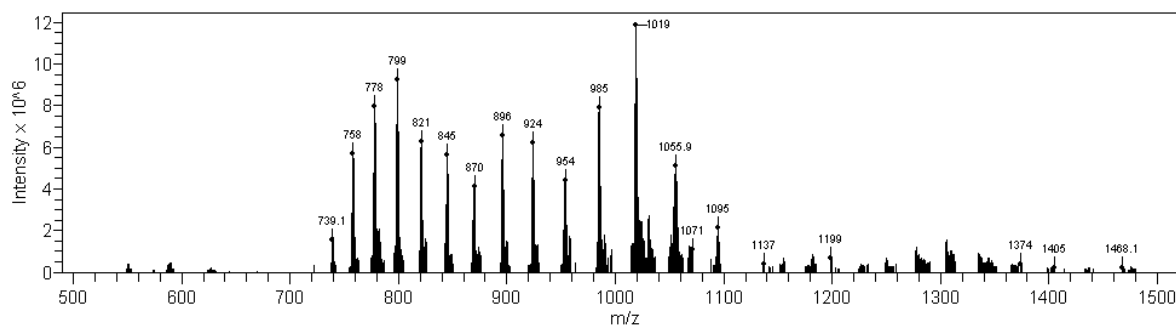

## References

1. J. M. Chalker, S. B. Gunnoo, O. Boutureira, S. C. Gerstberger, M. Fernández-González, G. J. L. Bernardes, L. Griffin, H. Hailu, C. J. Schofield and B. G. Davis, *Chem. Sci.*, 2011, **2**, 1666.
2. P. Moody, M. E. B. Smith, C. P. Ryan, V. Chudasama, J. R. Baker, J. Molloy and S. Caddick, *ChemBioChem*, 2011, 1-3.
